# 1 No evidence for entrainment: endogenous gamma oscillations and 2 responses to rhythmic visual stimulation coexist in visual cortex

3 Katharina Duecker<sup>1\*</sup>, Tjerk P. Gutteling<sup>1</sup>, Christoph S. Herrmann<sup>2</sup>, and Ole Jensen<sup>1\*</sup>

4 <sup>1</sup>: University of Birmingham, School of Psychology, Centre for Human Brain Health, Birmingham, UK

5 <sup>2</sup>: Carl-von-Ossietzky University of Oldenburg, Faculty VI - Medicine and Health Sciences, Department of  
6 Psychology, Oldenburg, Germany

7 \*Correspondence: [kxd888@student.bham.ac.uk](mailto:kxd888@student.bham.ac.uk), [o.jensen@bham.ac.uk](mailto:o.jensen@bham.ac.uk)

---

## 9 Abstract

10 Motivated by the plethora of studies associating gamma oscillations (~30-100 Hz) with various neuronal  
11 processes, including inter-regional communication and neuroprotection, we asked if endogenous gamma  
12 oscillations in the human brain can be entrained by rhythmic photic stimulation. The photic drive produced a  
13 robust Magnetoencephalography (MEG) response in visual cortex up to frequencies of about 80 Hz. Strong,  
14 endogenous gamma oscillations were induced using moving grating stimuli as repeatedly shown in previous  
15 research. When superimposing the flicker and the gratings, there was no evidence for phase or frequency  
16 entrainment of the endogenous gamma oscillations by the photic drive. Rather – as supported by source  
17 modelling – our results show that the flicker response and the endogenous gamma oscillations coexist and  
18 are generated by different neuronal populations in visual cortex. Our findings challenge the notion that  
19 neuronal entrainment by visual stimulation generalises to cortical gamma oscillations.

20 **Key words:** Magnetoencephalography; Neuronal Oscillations; Entrainment; Gamma Oscillations; Fre-  
21 quency Tagging; Flicker; Photic drive

22

---

## 23 **Introduction**

24 Neuronal cell assemblies have long been known to synchronise their discharges with millisecond preci-  
25 sion (Buzsáki et al., 1992; Traub et al., 1996; Singer, 1999; Varela et al., 2001). This synchronisation has  
26 been linked to oscillatory activity in the gamma-frequency band ( $\sim 30$ -100 Hz) in various brain regions  
27 and species, e.g. in rodents and primates (e.g. Eckhorn et al., 1988; Gray & Singer, 1989; Engel et al.,  
28 1992; Wehr & Laurent, 1996; Brosch et al., 2002), including humans (e.g. Tallon et al., 1995; Müller et  
29 al., 1997; Rodriguez et al., 1999; Hoogenboom et al., 2006). Neuronal gamma oscillations have been pro-  
30 posed to support neuronal computations within populations (Singer & Gray, 1995; Singer, 1999; Von der  
31 Malsburg, 1999; Engel et al., 2001; Singer, 2009; Nikolić et al., 2013) as well as inter-regional functional  
32 connectivity through coherence (Bressler, 1990; Varela et al., 2001; Fries et al., 2007). Furthermore, they  
33 have been associated with various cognitive functions (see Başar-Eroglu et al., 1996; Herrmann & Meck-  
34 linger, 2001; Jensen et al., 2007; Tallon-Baudry, 2009; Uhlhaas et al., 2009, for review). In accordance with  
35 that, anomalies in gamma-band activity have been reported in neurological and psychological disorders that  
36 are related to impaired cognition and awareness, such as Autism Spectrum Disorder, Schizophrenia and  
37 Alzheimer’s Dementia (see Herrmann & Demiralp, 2005; Uhlhaas & Singer, 2006; Uhlhaas et al., 2009;  
38 Traub & Whittington, 2010; Grützner et al., 2013, for review). In this study, we aimed to investigate if en-  
39 dogenous gamma oscillations in the human visual system can be driven non-invasively by rhythmic photic  
40 stimulation. Developing a methodology to directly manipulate gamma oscillations would allow to probe  
41 their role in neuronal processing and cognition, as well as their therapeutic potential. Indeed, in rodents,  
42 oscillatory neuronal responses to both optogenetics and a visual flicker at 40 Hz have been associated with  
43 neuroprotective responses and reduced neuroinflammation (Iaccarino et al., 2016; Adaikkan et al., 2019);  
44 making it a promising tool to reverse neurodegeneration linked to Alzheimer’s Dementia. These findings  
45 have been explained by an *entrainment*. i.e. a synchronisation, of intrinsic gamma oscillations with the  
46 stimulation (Adaikkan & Tsai, 2020). The prerequisite of entrainment, as considered in dynamical sys-  
47 tems theory, is the presence of a self-sustained oscillator that synchronises to the external drive (Pikovsky  
48 et al., 2003). This definition has often not been sufficiently embraced in studies of neuronal entrainment  
49 to sensory stimulation, as pointed out by Helfrich et al. (2019). A related phenomenon that is reflected by  
50 periodic responses to a rhythmic drive and an amplification of individually preferred rhythms is *resonance*

51 (Hutcheon & Yarom, 2000). Resonance does however not require the presence of self-sustained oscillations  
52 per se (Pikovsky et al., 2003; Helfrich et al., 2019). Indeed, oscillatory activity in response to a photic drive  
53 at frequencies ranging from 1 to up to 100 Hz in human Electroencephalography (EEG) recordings, have  
54 revealed a selective amplification of frequencies in the gamma band (Herrmann, 2001; Gulbinaite et al.,  
55 2019), indicating resonance in the visual cortex. Here, we explore both resonance and entrainment in the  
56 visual system to a visual flicker at frequencies  $>50$  Hz. Stimulation at such high frequencies has recently  
57 been applied in Rapid Frequency Tagging (RFT) protocols, to investigate spatial attention (Zhigalov et al.,  
58 2019) and audiovisual integration in speech (Drijvers et al., 2020, bioRxiv), with minimal visibility of the  
59 flicker.

60 Oscillatory responses to photic stimulation from 52 to 90 Hz, recorded with MEG, were investigated in  
61 the presence and absence of visually induced gamma oscillations. In the *flicker* condition, the rhythmic drive  
62 was applied to a circular, invisible patch. In the *flicker&gratings* condition, the flicker was superimposed  
63 on moving grating stimuli that have been shown to reliably induce gamma oscillations (Hoogenboom et  
64 al., 2006, 2010; Van Pelt & Fries, 2013), thus meeting the precondition for entrainment. We expected the  
65 resonance properties of the visual system to change in presence of the endogenous gamma oscillations,  
66 as well as a synchronisation of the endogenous gamma oscillations with the rhythmic flicker. As we will  
67 demonstrate, the moving gratings did generate strong endogenous gamma oscillations, and the photic drive  
68 did produce robust responses at frequencies up to 80 Hz. However, to our great surprise, there was no  
69 evidence that the rhythmic stimulation entrains endogenous gamma oscillations.

## 70 **Results**

71 The aim of the current study was to characterise entrainment and resonance properties in the visual cortex  
72 in absence and presence of gamma-band oscillations induced by visual gratings. To this end, we drove  
73 the visual cortex with a rapid flicker at frequencies ranging from 52 to 90 Hz, in steps of 2 Hz. The photic  
74 drive was applied either to a circular patch (the *flicker* condition, Figure 10A,C) or to the light grey rings of a  
75 moving grating stimulus (the *flicker&gratings* condition, Figure 10B,D). We hypothesised that a photic drive  
76 within the frequency range close to the individual gamma frequency in the *flicker&gratings* condition would  
77 entrain the grating-induced oscillations. This would be observed as the endogenous gamma oscillation

78 synchronising with the drive. Moreover, we expected the presence of the induced gamma oscillator to change  
79 the resonance properties (compared to the *flicker* condition), reflected by an amplification of responses to  
80 stimulation frequencies equal or close to the endogenous gamma rhythm. Response magnitudes in the  
81 *flicker* condition were expected to reveal resonance properties of the visual system in absence of gamma  
82 oscillations, demonstrating favourable stimulation frequencies to be used in future experiments applying  
83 Rapid Frequency Tagging (RFT; Zhigalov et al., 2019; Drijvers et al., 2020).

#### 84 **Identifying Individual Gamma Frequencies**

85 The frequency of the endogenous gamma rhythm is known to vary between participants (Hoogenboom et  
86 al., 2006, 2010; Muthukumaraswamy et al., 2010). Therefore, each subject's Individual Gamma Frequency  
87 (IGF) was identified first, based on the 0 - 2 s interval in the *flicker&gratings* condition during which  
88 the moving grating stimuli were presented without the visual flicker (Figure 10C). The Time-Frequency  
89 Representations (TFRs) of power are depicted in Figure 1A,B for two representative participants. The centre  
90 column shows the power averaged over time (0.25 - 1.75 s after the stimulus onset to avoid any event-related  
91 field confounds) demonstrating distinct peaks at 58 and 74 Hz for these participants. The topographies in the  
92 right column depict relative power change at the identified frequencies, focally in sensors over the occipital  
93 cortex. For each subject, the 2 - 3 combined planar gradiometers showing maximum relative power change  
94 in the gamma band were selected for further analysis (Sensors-of-Interest; SOI) per visual inspection. These  
95 sensors strongly overlapped between participants. The data of participants with an IGF closer than 6 Hz to  
96 the lowest (52 Hz) drive, i.e.  $IGF < 58$  Hz, were not considered for further analyses.

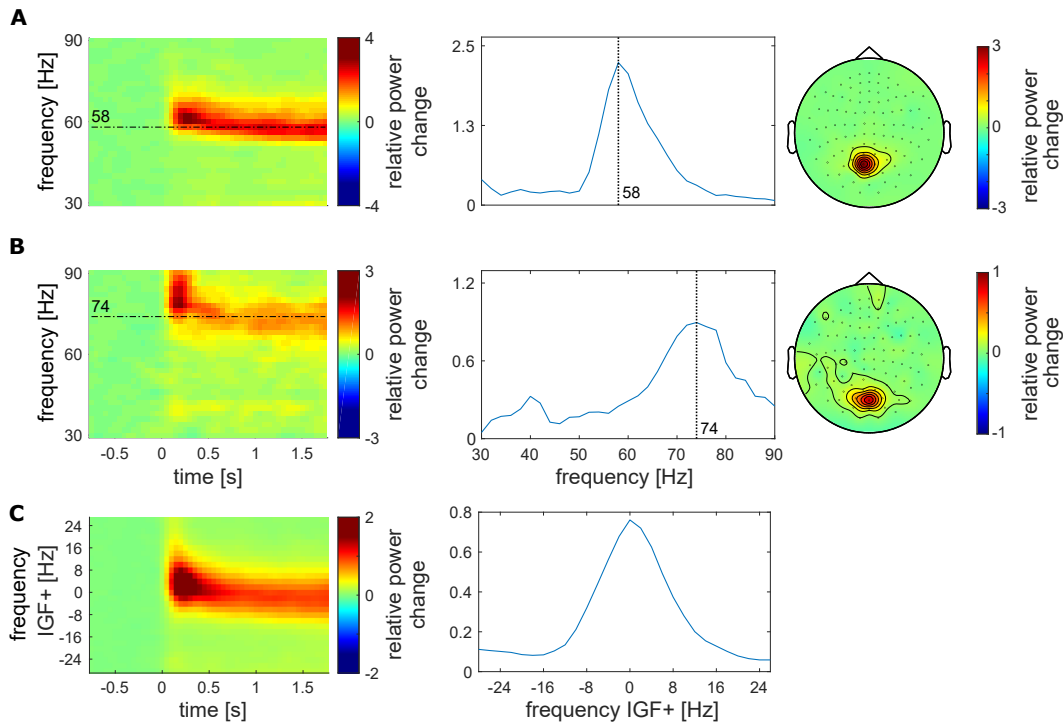

Figure 1: Identification of Individual Gamma Frequencies (IGF) and Sensors-of-Interest (SOI). **A**, **B** The TFRs of power, power spectra (averaged over 0.25 - 1.75 s) and topographic representations (combined planar gradiometers) of the IGF for two representative participants. The TFRs of power were calculated from the Fourier Transforms using a 500 ms sliding window, resulting in spectral smoothing of  $\pm 3$  Hz. The IGFs were identified from the spectral peak in 0.25 - 1.75s interval of the TFRs. Identified IGFs are indicated by dashed lines. **C** The grand-average of the power analysis after aligning the individual TFRs and spectra to the IGF (N=22).

97 Figure 1C depicts the averaged TFRs of power as well as the power spectrum for the remaining subjects  
98 (N=22), aligned to each participant's IGF prior to averaging. The moving grating stimulus induced sus-  
99 tained oscillatory activity constrained to the IGF  $\pm 8$  Hz, with an average relative power change of 80% in  
100 the 0.25 - 1.75 s interval compared to baseline. In short, the moving gratings produced robust gamma oscil-  
101 lations observable in the individual participants which reliably allowed us to identify the individual gamma  
102 frequencies.

103 **Photic drive induces responses up to ~80 Hz**

104 We next set out to quantify the rhythmic response to the flicker as a function of frequency in the *flicker*  
105 condition, in which stimulation was applied to an invisible patch. Figure 2 A and B, left panel, depicts the  
106 overlaid power spectra for the different stimulation frequencies in two representative participants (the same  
107 as in Figure 1). The spectra were estimated by averaging the TFRs of power in the 0.25 - 1.75s interval after  
108 flicker onset. Due to the overlap of the sensors detecting the gamma oscillations and photic drive response  
109 (compare Figure 1 and 2 right columns) the same SOI were used as in the *flicker&gratings* condition. Both  
110 individuals showed strong responses at the respective stimulation frequencies, with a maximum relative  
111 power change of 200% and 500% in subject A and B, respectively. It should be noted that the IGFs (indicated  
112 by vertical dashed lines) did not relate to the frequencies where the strongest RFT signal occurred ( $r(21)$   
113 = 0.038,  $p = 0.87$ , *flicker* condition). When averaged over all participants, the magnitude of the flicker  
114 response decreased systematically with frequency (Figure 2C).

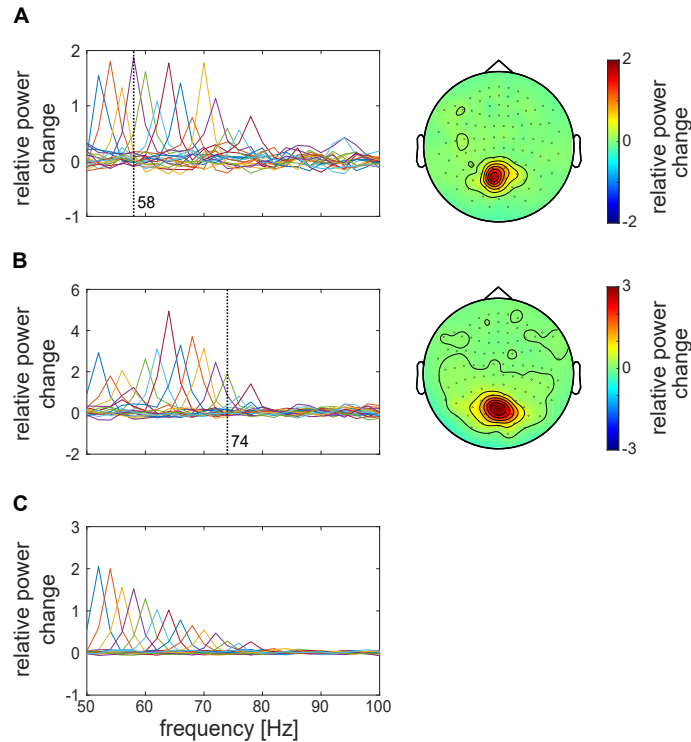

Figure 2: **A,B** The response to the photic drive in the *flicker* condition and the corresponding topographies for two representative subjects. Spectra were estimated from the TFRs of power averaged in the 0.25 - 1.75 s interval. Dashed vertical lines indicate the participants' IGF. The topographies (combined planar gradiometers) demonstrate a strong overlap with the ones in Figure 1. **C** Grand-average of the responses to the photic drive for each flicker frequency. On average, the magnitude of the flicker response decreases with increasing frequency, and is identifiable for stimulation below 80 Hz.

115 Figure 3A displays the power spectra in the *flicker* condition, estimated from the TFRs as explained  
116 above, averaged over all participants, as a function of stimulation frequency. These are equivalent to 2C.  
117 Diagonal values indicate the magnitude of the oscillatory responses (relative to baseline) at the stimulation  
118 frequencies, reaching values of up to 300% and decreasing monotonically with frequency. This confirms  
119 an upper limit for the stimulation of around 80 Hz. Off-diagonal values indicate oscillatory activity at  
120 frequencies different from the stimulation frequency. Figure 3B shows the same spectra after aligning to the  
121 individual IGFs, prior to averaging. Figure 3C and D display the spectra in the *flicker&gratings* condition

122 (averaged in the 2.25 - 3.75s interval), during which the photic drive was applied to the moving grating  
123 stimulus (see Figure 10B). The induced gamma band activity can be observed as the horizontal yellow band  
124 at  $\sim 60$  Hz. When aligning the spectra to the IGF (Figure 3D), we observe a decrease in the flicker response  
125 but no evidence for an amplification at or close to the IGF.

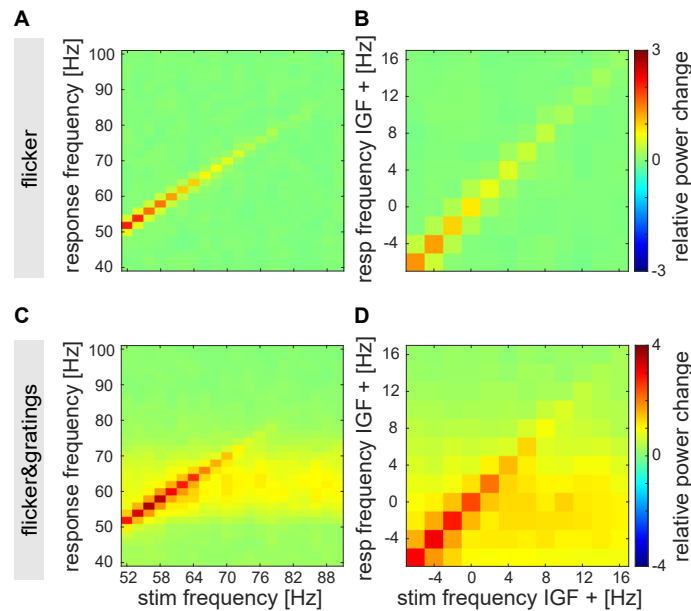

Figure 3: Average relative power change to the photic drive (y-axis) with respect to the driving frequencies (x-axis) **A** The *flicker* condition. Note that the power changes mirror Figure 2C. Power decreases with increasing frequency, from a relative change of  $\sim 3$  at 52 HZ to  $\sim .5$  at 80 Hz. **B** The *flicker* condition after the spectra were aligned to the IGF. **C** The *flicker&gratings* condition. All spectra demonstrate both the flicker response and induced gamma oscillation (observed as the yellow/orange horizontal band). Again, the amplitude of the rhythmic stimulation response appears to decrease with increasing frequency in both conditions. **D** The spectra for the *flicker&gratings* condition now aligned to the IGF. There is no indication that the rhythmic flicker captures the endogenous gamma oscillations.

### 126 **Magnitude of flicker response decreases as a function of frequency**

127 The averaged TFRs of power in Figure 3 point to an approximately linear decrease in power of the flicker  
128 response with increasing frequency. Literature on neural resonance and entrainment, however, suggests the



129 existence of a preferred rhythm at which oscillatory responses are amplified (Hutcheon & Yarom, 2000; Her-  
130 rmann, 2001; Pikovsky et al., 2003; Notbohm et al., 2016; Gulbinaite et al., 2019). As argued in Pikovsky et  
131 al. (2003) phase-locking between the driving signal and the self-sustained oscillator is the most appropriate  
132 metric to investigate entrainment. Figure 4A,B depicts the phase-locking value (PLV) between the photodi-  
133 ode and the MEG signal at the SOI (planar gradiometers, not combined). This measure reveals a systematic  
134 decrease in phase-locking with increasing flicker frequency for both the *flicker* (orange) and *flicker&gratings*  
135 (blue) condition (A). The observed relationship is preserved when aligning the frequencies to the IGF (B,  
136 also see Table 1). Note the absence of increased phase-locking at the IGF. The magnitude of the flicker  
137 response, quantified by power change compared to baseline, as a function of frequency, is demonstrated in  
138 Figure 4C-F and depicts a similar relationship to the one observed for the PLV. The *flicker* condition (C, or-  
139 ange line) revealed a systematic decrease with frequency, whereas the *flicker&gratings* condition did show  
140 a peak at 56 Hz. However, this observed increase appeared to be caused by considerable variance between  
141 the power estimates of the individual participants (see Figure 4E, each line graph depicts power estimates  
142 per individual participant). We again aligned the spectra to the IGF before computing the grand-average  
143 (Figure 4D). The absence of a peak at 0 Hz suggests no evidence for resonance at the IGF, confirming the  
144 peak at 56 Hz in C to be the result of inter-subject variability. Indeed, simple linear regression models, fit  
145 individually to PLV and power as a function of frequency aligned to the IGF, separately for each condition,  
146 explain a considerable amount of the variance (see Table 1 and dotted lines in Figure 4). We then identified  
147 the individual peak frequencies, eliciting the strongest response to the flicker in the *flicker&gratings* condi-  
148 tion 4E, and related those to the IGF, as seen in Figure 4F. Importantly, the frequency inducing the strongest  
149 response to the rhythmic drive was below the IGF in the majority of participants, whereby the frequencies  
150 turned out to be uncorrelated ( $r(21)=-0.15$ ,  $p=0.5$ , *flicker&gratings* condition).

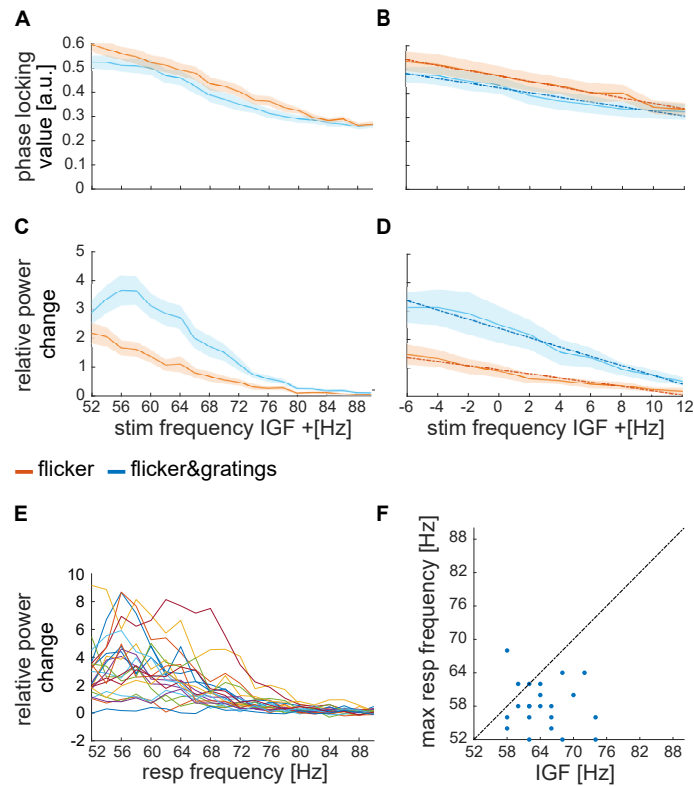

Figure 4: Magnitude of the flicker response as a function of frequency in the *flicker* (orange) and *flicker&gratings* (blue) condition. **A** The phase-locking values between the photo-diode and the MEG signal over the SOIs as a function of driving frequency. **B** The phase-locking values between the photo-diode and the MEG signals as a function of frequency after the spectra were aligned to IGF. Again, the phase-locking decreases with increasing frequency (see Table 1 for a statistical quantification of the simple linear regression models). **C** Relative power change with respect to baseline as a function of frequency. Generally, the power decreased with frequency, however, in the *flicker&gratings* there is an apparent peak at  $\sim 56$  Hz; yet, the shaded errors (SE) indicate considerable variance between participants. **D** The relative power spectra as a function of frequency after the individual spectra were aligned in frequency according to the IGF, demonstrating that responses to a photic drive at the IGF are not amplified. **E** Relative power change as a function of frequency for each individual subject ( $N = 22$ ), indicates that the peak at  $\sim 56$  Hz in **C** is driven by comparably high power in that frequency range in just a few individuals. **F** Flicker frequency inducing highest power values versus IGF, demonstrating no systematic relationship ( $r(21) = -0.15, p = .5$ ). Instead, the frequencies inducing maximum power change were below the IGF in the majority of participants.

Table 1: Simple linear regression models: Flicker response magnitude as a function of distance to IGF.

| Model                                      | Estimates |       |               |       |          |
|--------------------------------------------|-----------|-------|---------------|-------|----------|
|                                            | $\beta_1$ | t     | p ***         | $R^2$ | F(1,218) |
| <i>flicker</i> <sub>plv</sub>              | -.01      | -8.07 | $< 2.2e - 16$ | .23   | 65.07    |
| <i>flicker&amp;gratings</i> <sub>plv</sub> | -.01      | -7.24 | $< 2.2e - 16$ | .19   | 52.44    |
| <i>flicker</i> <sub>pow</sub>              | -.07      | -9.01 | $4.80e - 14$  | .27   | 81.14    |
| <i>flicker&amp;gratings</i> <sub>pow</sub> | -.16      | -8.95 | $7.51e - 12$  | .27   | 80.13    |

### 151 **Gamma oscillations and flicker response coexist**

152 We initially hypothesised that entrainment of the gamma oscillations in the *flicker&gratings* condition would  
153 result in the photic drive capturing the oscillatory dynamics when the driving frequency was close to endoge-  
154 nous gamma oscillations. Figure 5 depicts the TFRs of power relative to a 0.5 s baseline, for one represen-  
155 tative subject (also shown in Figure 1 and 2A). The averaged trials for a photic drive at 52 Hz are shown in  
156 Figure 5A and separately for each flicker frequency in Figure 5B (Figure created using Kumpulainen, n.d.).  
157 The IGF (58 Hz for this subject) and the respective stimulation frequencies are indicated by dashed lines.  
158 The endogenous gamma oscillations, induced by the moving grating stimulus, are observed as the sustained  
159 power increase from 0 - 6 s whereas the flicker response is demonstrated by a power increase at 2 - 4 s.  
160 The plots reveal that gamma oscillations persist at the IGF and coexist with the response to the photic drive,  
161 which is particularly apparent for stimulation at 52 Hz (Figure 5 A). Furthermore, the power increase at the  
162 flicker frequency does not appear to outlast termination of the drive at  $t = 4$  s. In the subsequent step, we  
163 frequency-aligned the TFRs of power according to the IGF before averaging over participants. Again, the  
164 analyses were constrained to individuals with an IGF above 56 Hz (N = 22).

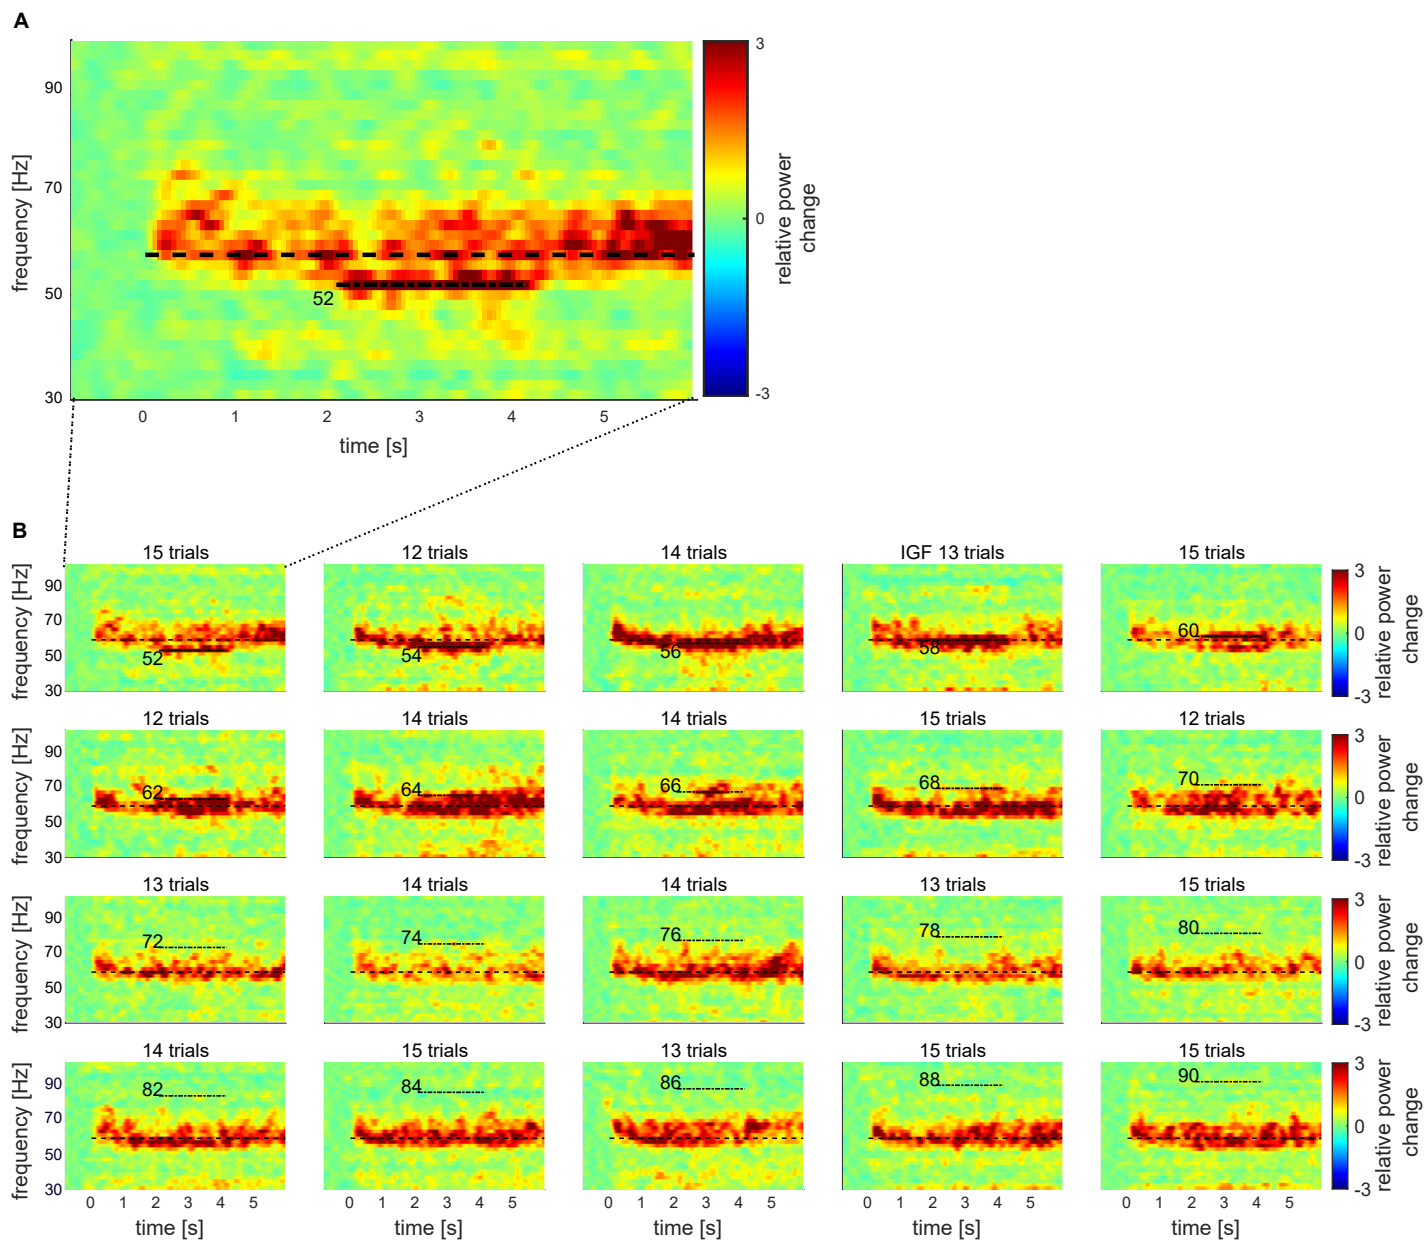

Figure 5: The time-frequency representations (TFRs) of power for one representative subject, showing relative power change averaged over trials and SOIs in the *flicker&gratings* condition. **A** Photic drive at 52 Hz. The moving grating stimuli were presented for 0 - 6 s whereas the flicker was applied from 2 to 4 s. Sustained gamma-band activity is clearly observable throughout the presentation of the stimuli, with a power increase of 3 relative to baseline. Additionally, the rhythmic stimulation elicited a response at 52 Hz, which seems to coexist with the gamma oscillations, indicating that the photic drive is unable to capture the dynamics of the gamma oscillation. **B** The plots for the frequencies from 52 to 90 Hz. Stimulation frequencies and IGF (here 58 Hz) are indicated by horizontal dashed lines. The flicker induced responses up to 66 Hz in this participant. Gamma oscillations persist in presence of flicker responses, suggesting that they coexist.

165 The group averaged, aligned TFRs are shown in Figure 6 for frequencies ranging from IGF-6 Hz to  
166 IGF+16 Hz. The endogenous gamma oscillations are observed as the power increase extending from 0 - 6  
167 s, and the flicker response as the power change in the 2 - 4 s interval marked by dashed lines, respectively.  
168 The photic stimulation induces a reliable response that decreases toward 12 Hz above the IGF. Despite the  
169 representation of the gamma oscillations being smoothed due to inter-individual differences, the averaged  
170 aligned TFRs of power support the observations in the single subject data: both the gamma oscillations and  
171 flicker response coexist in the 2 - 4 s interval. Furthermore, there is no indication of the gamma power being  
172 reduced during RFT at frequencies close to, but different from, the IGF.

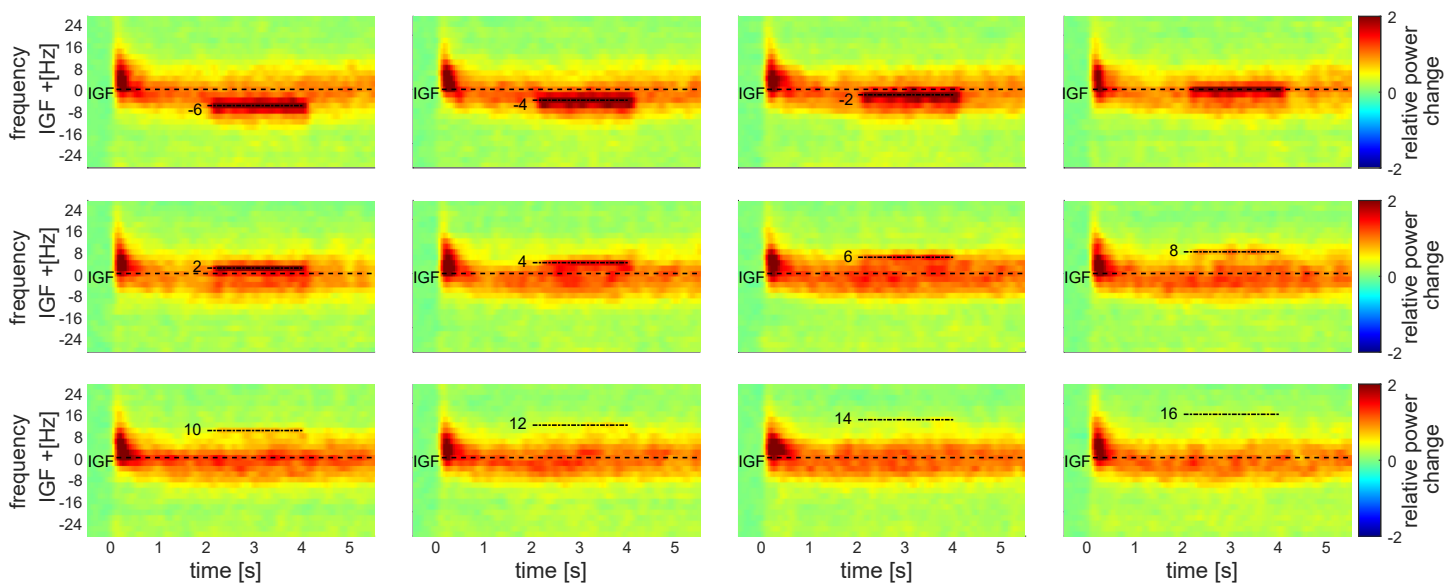

Figure 6: Grand-average TFRs of power after aligning to the IGF for each subject in the *flicker&gratings* condition. The stimulation frequencies (from -6 to 16 Hz relative to the IGF) are indicated by dashed horizontal lines. As suggested by the single subject TFRs in Figure 5, the endogenous gamma oscillations and the flicker response seem to be coexistent. Thus, there is no obvious indication of the photic drive being able to capture the dynamics of the gamma oscillations.

### 173 **No evidence that the oscillatory gamma dynamics can be captured by frequency entrainment**

174 Synchronisation of neuronal oscillations by rhythmic stimulation could be conceptualised as the entrainment  
175 of a self-sustained oscillator by an external force (e.g. Notbohm et al., 2016; Helfrich et al., 2019). A central  
176 assumption of this phenomenon is the existence of a 'synchronisation region' in the frequency range around  
177 the endogenous frequency of the oscillator, the so-called Arnold tongue (e.g. Pikovsky et al., 2003). Driving  
178 frequencies falling inside this synchronisation region, will be able to modulate the dynamics of the self-

179 sustained oscillator (also see Hutt et al., 2018). With this in mind, we investigated the power of the gamma  
180 oscillations before and during the photic drive for frequencies in the vicinity of the IGF (Figure 7) in the  
181 *flicker&gratings* condition. For each participant, we considered the relative power change induced by the  
182 moving gratings in the 0.5 - 1.5 s interval (T1) before the flicker onset and in the 2.5 - 3.5 s interval (T2)  
183 in which both the moving gratings and the photic drive were present. We investigated this for stimulation  
184 frequencies below the IGF (averaged power for -6 and -4 Hz) and above (averaged power for +4 and +6  
185 Hz). Assuming a symmetric Arnold tongue centred at the IGF, as shown for entrainment in the alpha-band  
186 (Notbohm et al., 2016), we expected a reduction in power at the IGF in interval T2 for both higher and  
187 lower driving frequencies, i.e. an effect of time, but not frequency. Figure 7A depicts power change at  
188 the IGF for the factors stimulation frequency (drive<IGF and drive>IGF) and time interval (T1 and T2),  
189 averaged over the SOIs for each subject. In accordance with the TFRs in Figure 6, there is no meaningful  
190 indication for gamma power being reduced during the T2 interval as compared to the T1 interval, affirming  
191 the coexistence of the two responses. Surprisingly, power at the IGF seems to be slightly enhanced at T2  
192 for drive>IGF. Indeed, a factorial repeated-measures ANOVA on the factors *time* and *frequency* did not  
193 reveal any significant main effects. However, there was a significant interaction effect of *interval* (T1 vs  
194 T2) and *frequency* (drive<IGF vs drive>IGF) ( $F(1, 21) = 5.09, p = 0.003^{**}, \eta^2 = .003$ ), which was  
195 unexpected based on the assumption of a symmetrical synchronisation area around the IGF. A post-hoc  
196 dependent sample t-test, comparing power change at T2 relative to T1 for drive<IGF and drive>IGF (see  
197 Figure 7B) indicated that the interaction was driven by the increased gamma power during drive>IGF,  
198  $t(21) = -2.44, p = 0.012^*, 95\%CI = [-Inf - 0.029], r = .22$ . Importantly, we were unable to find the  
199 expected reduction in gamma power during rhythmic photic stimulation, i.e. there was no indication that the  
200 rhythmic drive was capturing oscillatory gamma dynamics.

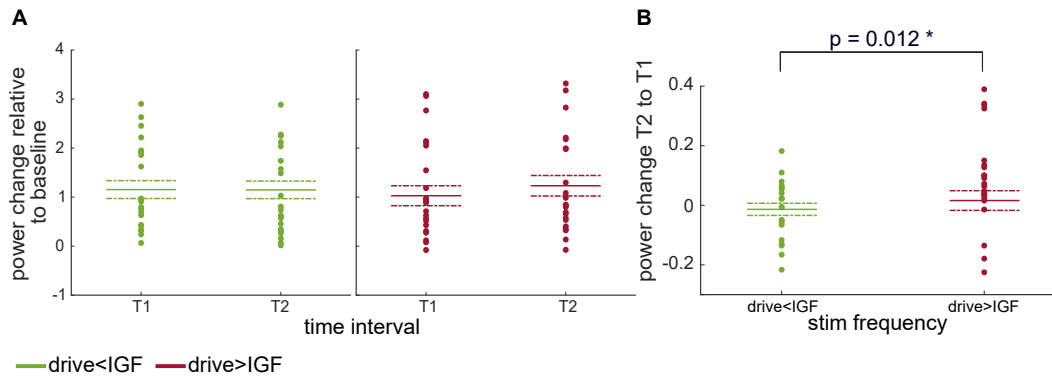

Figure 7: **A** Power change relative to baseline at IGF in response to the moving grating stimuli before (T1; 0.5 - 1.5 s) and during application of the flicker (T2; 2.5 - 3.5 s), at frequencies below and above IGF (drive<IGF [-6, -4 Hz] and drive>IGF [+4, +6 Hz], respectively). Scatters demonstrate individual values, solid and dashed lines depict mean and standard errors, respectively. The key finding is that power at T2 is not decreased compared to T1 for either of the frequency ranges. Instead, the plots show a slight increase in power at T2 for drive>IGF. A repeated measures ANOVA indicates a significant interaction of frequency and interval ( $F(21, 1) = 5.09, p = 0.003^{**}, \eta^2 = .003$ ), but no main effect of time interval. **B** Power change at T2 relative to T1, for flicker frequencies below and above IGF. A post-hoc dependent sample t-test reveals that the interaction in **A** was driven by a significant increase of IGF power during the photic drive at frequencies just above IGF, ( $t(21) = -2.44, p = 0.012^*, r = .22$ ).

## 201 **Photic drive does not reliably modulate gamma phase**

202 Synchronisation of a self-sustained oscillator by an external force, i.e. entrainment, is reflected by a con-  
 203 stant phase angle between the two oscillators over extended intervals, so-called *phase plateaus*. These might  
 204 occur when the frequency of the driver is close to the endogenous frequency of the oscillator, i.e. within its  
 205 Arnold Tongue (Tass et al., 1998; Pikovsky et al., 2003; Notbohm et al., 2016). When approaching the edge  
 206 of the synchronisation region, episodes of constant phase angles are interrupted by so-called *phase slips* that  
 207 emerge when the self-sustained oscillator briefly unlocks from the driving force and oscillates at its own  
 208 frequency. These phase slips will be observed as steps between the phase plateaus. We implemented the  
 209 phase plateau analysis to complement the PLV analysis in Figure 4, which quantifies the average synchrony  
 210 between photodiode and neuromagnetic signal over trials, but is not able to identify intermittent plateaus.  
 211 If the photic drive entrains endogenous gamma oscillations, strong phase locking is expected, reflected by  
 212 phase plateaus sustained over the duration of at least one cycle of the flicker frequency. These would be par-  
 213 ticularly pronounced during stimulation at and close to the IGF in the *flicker&gratings* condition, due to the



214 presence of the self-sustained gamma oscillator, but not in the *flicker* condition. To investigate phase entrain-  
215 ment of the gamma oscillations by the photic drive, we inspected the phase angle between the photodiode  
216 and one, individually selected, occipital gradiometer of interest per participant. Time series of phase per  
217 trial were estimated separately for the two signals, using a sliding time-window Fourier transform approach  
218 ( $\Delta T = 3 \text{ cycles} = 3/f_{flicker}$ s; Hanning taper). Phase differences per trial were obtained by subtracting the  
219 unwrapped phase angle time series in the two sensors.

220 *Phase angle between photodiode and MEG signal over time* Figure 8 illustrates the unwrapped phase  
221 angles between the MEG and photodiode signal during the photic drive at the IGF (here 58 Hz), in the *flicker*  
222 (A) and *flicker&gratings* condition (B), respectively, for the same representative participant shown in Figure  
223 1A, 2A and 5. Each coloured line graph depicts an individual trial. In both conditions, the MEG signal drifts  
224 apart from the photic drive, towards a maximum difference of 60 radians, i.e. a phase difference of about  
225 9.5 cycles, by the end of the trial (A and B, top panel). Interestingly, the direction of the phase angle appears  
226 to change during some of the trials, suggesting spectral instability of the gamma oscillations. Furthermore,  
227 the graphs demonstrate a substantial inter-trial variability. This diffusion between trials, quantified for each  
228 participant as the standard deviation over trials at the end of the photic stimulation ( $t=2$  in *flicker* and  $t=4$   
229 in *flicker&gratings* condition), converted from radiant to ms, is juxtapositioned in Figure 8C for the two  
230 conditions. It can be readily seen that the phase angles between the stimulation and MEG signal fan out  
231 highly similarly in absence and presence of the endogenous gamma oscillations.

232 *Phase plateaus* Visual inspection of the first 0.25 s of the phase angle times series, depicted in Figure  
233 8A,B lower panel, does not suggest a comparably high number of phase plateaus in the *flicker&gratings*  
234 condition, that would have been expected if the photic drive was able to entrain the endogenous gamma  
235 oscillator. Importantly, the graphs demonstrate the phase angles to reach values of over  $2\pi$ , i.e. more than  
236 one cycle, within the duration of the first gamma cycle (17.2 ms), suggesting that even stimulation at the  
237 endogenous frequency of the oscillator cannot capture the gamma dynamics. To verify these observations  
238 for the entire sample, plateaus during stimulation at the IGF were identified based on the mean absolute gra-  
239 dient ( $\leq 0.01$ , see equation 3) over the duration of one cycle of stimulation, i.e. 18 consecutive samples for a  
240 flicker frequency of 58 Hz. Figure 8D shows the average number of plateaus per trial as a function of flicker



241 frequency aligned to IGF, averaged over participants. Again, the shaded areas indicate the standard error.  
242 While the *flicker&gratings* condition exhibits more phase plateaus than *flicker* for all stimulation frequen-  
243 cies, the number of plateaus decreases similarly in both conditions with increasing frequency. Importantly,  
244 stimulation at the IGF did not result in the highest number of plateaus in either condition. The results affirm  
245 the observations presented in Figure 4A and B.

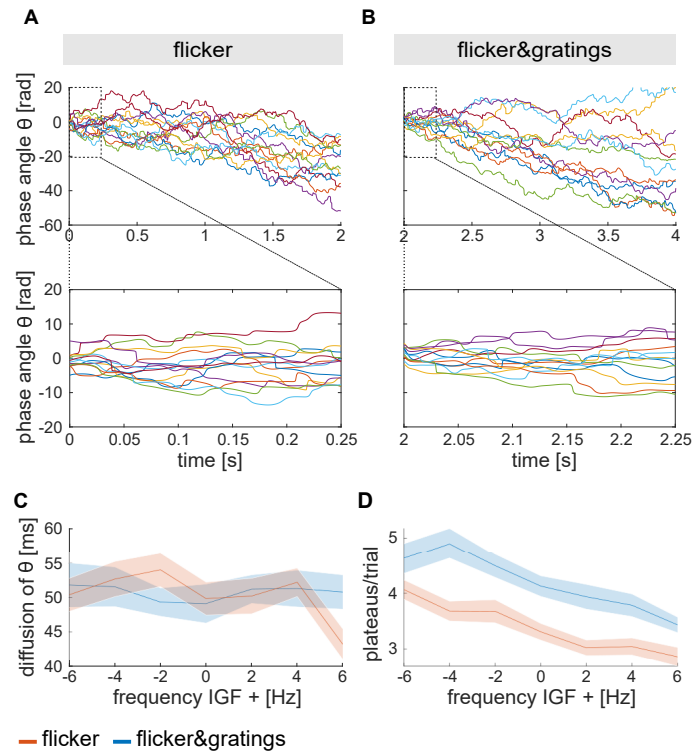

Figure 8: **A,B** Phase angle between photodiode and the MEG signal (one gradiometer of interest) at the IGF, for one representative participant; coloured lines depict individual trials. **A** Phase angle  $\theta$  in the *flicker* condition over duration of the flicker presentation (upper panel) and the first 250 ms (lower panel). The MEG signal drifts apart from the stimulation and can reach a maximum accumulated phase difference of 60 rad, i.e. 9.54 cycles, at the end of the stimulation and up to 15 rad, i.e. 2.39 cycles, in 250 ms. **B** The increase in phase difference over the time of the stimulation for the *flicker&gratings* condition (upper panel) and in the first 250 ms (lower panel). The diffusion of the phase difference across trials is similar to the *flicker* condition. Moreover, there is no clear difference in the number and length of phase plateaus between conditions, implying that the presence of the gamma oscillations does not facilitate entrainment at the IGF. **C** Fanning out across trials as a function of frequency aligned to IGF. Trials diffuse to a highly similar extent in both conditions and across frequencies. **D** Number of plateaus per trial as a function of frequency. While the *flicker&gratings* conditions exhibits more plateaus for all flicker frequencies, there is no indication that stimulation at the IGF results in comparably strong synchronisation.

## 246 **The sources of the gamma oscillations and the flicker response peak at different locations**

247 The coexistence of the endogenous gamma oscillations and flicker response suggest that these two signals  
248 are generated by different neuronal populations; possibly in different regions. To test this assumption we  
249 localised the respective sources using Linearly Constrained Minimum Variance spatial filters (LCMV; Veen  
250 et al., 1992), estimated based on the data of the -0.75 to -0.25 baseline and the 0.25 to 1.75 s stimulation  
251 intervals in both conditions. Note that for each participant, one common filter was used for source estima-  
252 tion in both conditions. Power values at the IGF and flicker frequencies, averaged up to 78 Hz, respectively  
253 for the *flicker&gratings* and *flicker* condition, were extracted, and relative power change was computed at  
254 each of the 37,163 dipole locations using equation 1. Figure 9 illustrates the grand-average of the source  
255 localisation for the gamma oscillations (A) and flicker response (B). Consistent with previous work, both  
256 responses originate from mid-occipital regions (Hoogenboom et al., 2006; Zhigalov et al., 2019). Interest-  
257 ingly, the peak location of the endogenous gamma oscillator was significantly inferior to the flicker response  
258 (dependent sample t-test  $t(21) = -5.12, p = 2.29e - 5^{***}, r = .55, 95\% CI = [-Inf - 5.67]$ , see Fig-  
259 ure 9C and D). Indeed, using the MNI to Talaraich mapping online tool by Biomag Suite Web (MNI2TAL  
260 Tool) (see Lacadie et al., 2007, 2008), the centre peak of the gamma oscillations was located in the left  
261 secondary visual cortex (V2, Brodmann area 18; MNI coordinates = [-6mm -96mm -8mm]), while the peak  
262 of the flicker response was at a two millimetre distance to the primary visual cortex (V1, Brodmann area 17;  
263 MNI coordinates [6mm -96mm 4mm]). It should be noted, however, that using MRICroGL, with the Auto-  
264 mated Anatomical Labelling atlas 3 (AAL3) (Rolls et al., 2020), the anatomical landmarks of the gamma  
265 oscillations and flicker responses were identified in the left and right Calcarine fissure (and surrounding cor-  
266 tex), respectively, which is considered to mainly cover the primary visual cortex (Johns, 2014). Crucially,  
267 while the sources of the gamma oscillations and the flicker response overlap to some extent, they peak in  
268 distinguishable locations in occipital regions.

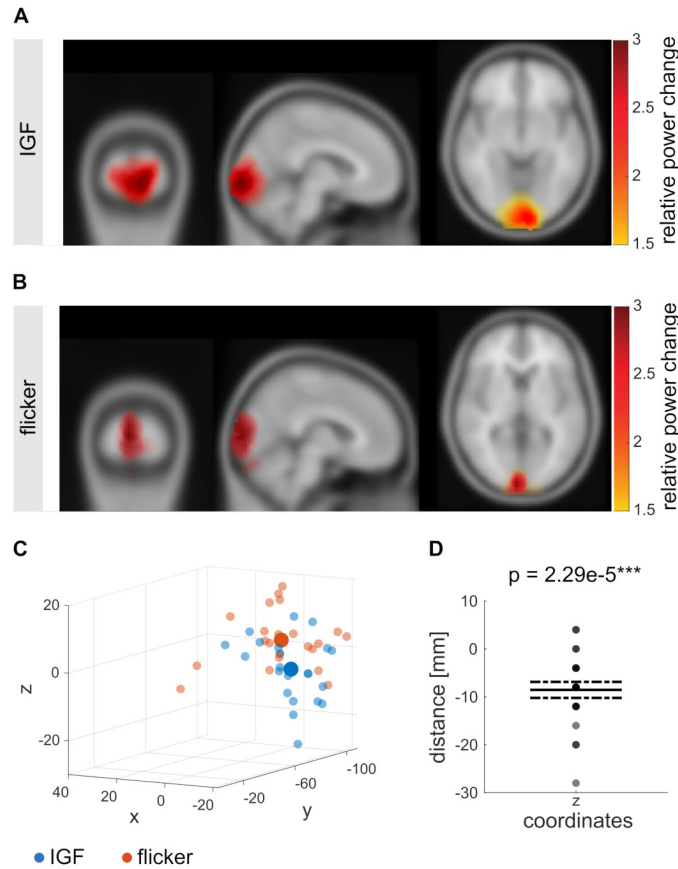

Figure 9: Source estimates using the LCMV beamformer approach mapped on a standardised MNI brain. **A** Source estimation of the visually induced gamma oscillations, with the peak of the source identified at MNI coordinates [0mm -98mm -7mm]. **B** Source estimation of the flicker response, with the average peak source at [3mm -96mm 2mm]. **C** Coordinates of the peak sources for all participants (small scatters) and grandaverage (large scatters) for the *flicker&gratings* and *flicker* condition (blue and orange, respectively), indicating that the gamma oscillations peak in brain areas inferior to the flicker response. **D** Difference between the z-coordinates (inferior-superior axis) of the peaks of the sources in both conditions, demonstrating an average difference of 8.5mm. A dependent sample t-test confirms this distance to be significant,  $t(21) = -5.12, p = 2.29e - 5^{***}, r = .55, 95\% CI = [-Inf - 5.67]$ .

## 269 **Discussion**

270 In this MEG study, we explored resonance properties and entrainment of the human visual system to a rapid  
271 photic drive  $>50$  Hz in the absence and presence of endogenous gamma oscillations. Strong, sustained  
272 gamma oscillations were induced using moving grating stimuli (Hoogenboom et al., 2006, 2010; Van Pelt  
273 & Fries, 2013; Muthukumaraswamy & Singh, 2013). This allowed us to identify the individual gamma  
274 frequency in each participant. The photic drive induced responses for frequencies up to  $\sim 80$  Hz, both in  
275 presence and absence of grating-induced endogenous gamma oscillations. To our surprise, we did not find  
276 evidence for resonance, i.e. an amplification of an individually preferred frequency in the range of the  
277 rhythmic stimulation, in either condition, despite the endogenous gamma rhythms being above 50 Hz in all  
278 participants. Moreover, there was no indication that the endogenous gamma oscillations synchronised with  
279 the rhythmic stimulation, i.e. no evidence for entrainment. Instead, the flicker response and the visually  
280 induced gamma-band activity appeared to coexist. Indeed, source estimation using Linearly Constrained  
281 Minimum Variance (LCMV) spatial filters (Veen et al., 1992), suggests that the neuronal sources of the  
282 flicker response and the endogenous gamma oscillations peak at distinct locations in visual cortex.

### 283 **Endogenous gamma oscillations and flicker response might be generated by different popu-** 284 **lations**

285 *Low-pass filter properties of the visual system might hinder entrainment* While the sources of the gamma  
286 oscillations and the response to the (nearly) invisible flicker did overlap in occipital cortex, their peak co-  
287 ordinates were found to be significantly different. Furthermore, the MNI2TAL online tool (see Lacadie  
288 et al., 2007, 2008) indicates that the two responses peak in different Brodmann areas, namely the primary  
289 (V1) and secondary visual cortex (V2), suggesting that the flicker response was unable to impact activity  
290 in visual cortex beyond V1. Several studies have considered the filter properties of different stages in the  
291 visual hierarchy of the mammalian brain (Cormack, 2005), i.e. retinal ganglion cells (e.g. Kuffler, 1953),  
292 lateral geniculate nucleus (LGN) of the thalamus and the primary visual cortex (e.g. Hawken et al., 1996;  
293 Carandini et al., 1997; Cormack, 2005; Ringach, 2004; Sharpee et al., 2006). The low-pass filter properties  
294 of the thalamus (Connelly et al., 2015) might have attenuated the photic drive in our data at frequencies  
295 above 80 Hz, leading to no measurable responses in this range. Interestingly, Hawken et al. (1996) found

296 low-pass filter properties at about 20 Hz in V1 in the projections from granular input layers (L4a, 4c $\alpha$  and  
297 4c $\beta$ ) to supragranular (L2/3, 4b) and infragranular layers (L5,6) (also see Douglas & Martin, 2004; Fröhlich,  
298 2016). Thus, the imposed flicker response might not travel beyond the granular layer of V1 and thus does  
299 not impact higher order visual areas, such as V2. This is supported by intracranial recordings in macaques  
300 which identified the strongest gamma synchronisation in response to drifting grating stimuli in V1 in supra-  
301 granular layers (L2/3 and 4B) (Xing et al., 2012), whereas steady-state responses to a 60 Hz photic flicker  
302 were localised in granular layer 4c $\alpha$  (Williams et al., 2004).

303 *Limitations of the source estimation* It should be noted that the source localisation shown in Figure 9A  
304 and B represents an estimated location of the neuronal populations from which the two responses emerge.  
305 Moreover, while the neuromagnetic signal at locations inside the head can be estimated with a limited set of  
306 parameters (forward problem), there is no unique solution to describe the electromagnetic sources outside  
307 the skull (inverse problem) (Baillet, 2013). Therefore, interpretations of sources of neuromagnetic signals  
308 recorded with MEG should be interpreted tentatively. Also note that, besides the peak source, the localisation  
309 of the gamma oscillations also includes inferior and mid-occipital regions covering primary and secondary  
310 visual cortex. Indeed, in previous work, the origins of the grating-induced gamma oscillations have been  
311 found in both V1 and V2 (Hoogenboom et al., 2006, 2010, but see Buffalo et al. 2011; Roberts et al. 2013  
312 for intra-cranial recordings in non-human primates). Again, it should be acknowledged that MRICroGL  
313 used with the AAL3 atlas (Rolls et al., 2020) indicates that both the gamma oscillations and flicker response  
314 emerge from Calcarine regions. Furthermore, due to the spectral width of the gamma oscillations (see Figure  
315 1C), we were unable to localise the flicker response in the *flicker&gratings* condition without confounds  
316 with the endogenous oscillator. Despite the concerns outlined above, we found a systematic difference  
317 between the sources of the two oscillatory activities: the source of the gamma oscillations was found to  
318 be significantly inferior to the flicker response. Pairing the current paradigm with intracranial recordings  
319 in non-human primates would enable to test the reliability of this observation with higher spatial precision.  
320 Alternatively, computational models, as the one demonstrated by Lee & Jones (2013), would be suitable to  
321 investigate whether the grating-induced gamma oscillations and flicker response are likely to be generated  
322 by different neuronal populations.

### 323 **No evidence for resonance at Individual Gamma Frequencies**

324 Adaikkan et al. (2019) demonstrate compelling evidence for a visual flicker at 40 Hz to modulate neuronal  
325 responses, to strengthen synapses and to protect neurons and non-neuronal cells from degeneration, in ro-  
326 dents. These effects have been attributed to a synchronisation of endogenous gamma oscillations with the  
327 photic drive. In parallel to that, in human subjects, systematic analyses of steady-state responses to rhythmic  
328 flickering lights at a broad frequency range from 1-100 Hz (Herrmann, 2001) and 3-80 Hz (Gulbinaite et  
329 al., 2019) have revealed amplified responses to stimulation at  $\sim 40$  and  $\sim 47$  Hz. These findings at first sug-  
330 gest that oscillatory activity in the gamma-band can be driven by photic stimulation. However, while these  
331 studies demonstrate resonance properties of the human visual system in the lower gamma band, they do  
332 not demonstrate entrainment of endogenous oscillations. We hypothesised the resonance properties of the  
333 visual system to be particularly pronounced when endogenous gamma oscillation were induced, resulting in  
334 amplified responses to a photic drive at the IGF. Yet, we did not find evidence for the endogenous gamma  
335 oscillator to resonate to the photic drive. It is uncertain whether neuronal gamma oscillations in the human  
336 brain are more difficult to target with sensory stimulation than the rodent brain, e.g. due to differences in  
337 cell-type expressions, and their laminar distribution (Hodge et al., 2019). Alternatively, our findings might  
338 be specific to grating-induced gamma oscillations that have been shown to vary with size and contrast of  
339 the stimuli (Schadow et al., 2007; Muthukumaraswamy & Singh, 2013; Perry et al., 2013; Orekhova et  
340 al., 2015). Furthermore, it has been pointed out that such strong, narrow-band gamma oscillations are only  
341 reliably induced by gratings, but not all visual stimuli, suggesting that they are generated by specialised neu-  
342 ronal circuits (Hermes et al., 2015). It remains to be investigated whether our results generalise to gamma  
343 oscillations in different (and broader) frequency-bands that are associated with different functional proper-  
344 ties (see Colgin et al., 2009; Ray & Maunsell, 2011; Buzsáki & Wang, 2012). Again, laminar recordings in  
345 non-human primates would allow conclusions about whether the neuronal populations receiving the photic  
346 input are able to converge to the neurons engaging in the endogenous gamma oscillations. Crucially, the  
347 results of the presented study imply that targeting endogenous gamma oscillations using sensory stimulation  
348 is not trivial.

### 349 **Overlap of flicker and grating induced gamma oscillations**

350 Gamma-band synchronisation in monkey area V4 has been shown to predict reaction times to a behaviourally  
351 relevant stimulus in a visual attention task (Womelsdorf et al., 2006). Similarly, in humans, both the gamma  
352 oscillations induced by a moving grating stimulus (Hoogenboom et al., 2010) and gamma-band flicker re-  
353 sponses (F. Bauer et al., 2009) have been reported to accelerate target detection, suggesting them to tune  
354 and organise neuronal responses in a similar way. It remains to be identified whether these functionally and  
355 spectrally similar oscillations can be generated by distinct neuronal populations with no anatomical over-  
356 lap. In that case, a rapid photic drive might not be feasible to probe the causal role of gamma oscillations,  
357 but it can be applied to modulate behaviour or for therapeutic purposes. Indeed, M. Bauer et al. (2012)  
358 have reported that while a 60 Hz influences drive perceptual processing, these effects appear to be indepen-  
359 dent of the stimulation phase; suggesting that they cannot be explained by an entrainment of endogenous  
360 oscillations.

### 361 **Spectral precision of the individual gamma frequencies**

362 The sliding time window approach paired with a 500ms Hanning taper, applied in the time-frequency anal-  
363 ysis, induced spectral smoothing of  $\pm 3$  Hz. Consequently, the estimated IGFs are unlikely to perfectly  
364 match the true peak frequency of the endogenous gamma oscillator. Moreover, the stimulation frequencies  
365 were chosen to have a resolution of 2 Hz which further might result in the true gamma peak frequency  
366 being missed by the photic drive. Studies investigating entrainment in the alpha (Notbohm et al., 2016) and  
367 beta-band (Hanslmayr et al., 2014) in human subjects have demonstrated modulating effects on neuronal  
368 oscillations for stimulation rhythms within the range of the endogenous frequencies  $\pm 1$  Hz. Moreover, the  
369 natural peak of the identified gamma frequencies extends over a frequency range of about 10-16 Hz (IGF  
370  $\pm 5-8$  Hz), indicating that it should cover about 4 stimulation frequencies for each participant. Therefore, we  
371 conclude that the frequency resolution in this study does not explain the lacking evidence for entrainment.  
372 Our findings are contrasted by studies on visual entrainment of neuronal alpha oscillations (Schwab et al.,  
373 2006; Spaak et al., 2014; Notbohm et al., 2016; Fiene et al., 2020), which have been reported to emerge  
374 from infragranular (Spaak et al., 2012) as well as supragranular layers (Haegens et al., 2015; Dougherty et  
375 al., 2017). While our results do not support entrainment of oscillations in the gamma-band, these studies



376 show that it is indeed possible to entrain oscillations at lower frequencies.

### 377 **Concluding remarks**

378 Our results suggest that rapid photic stimulation does not entrain endogenous gamma oscillations and can  
379 therefore not be used as a tool to probe the causal role of gamma oscillations in cognition and perception.  
380 However, the approach can be applied in Rapid Frequency Tagging (RFT) to track neuronal responses with-  
381 out interfering, for instance, to investigate covert spatial attention (Zhigalov et al., 2019) and multisensory  
382 integration (Drijvers et al., 2020, bioRxiv).

## 383 **Materials and Methods**

### 384 **Experiment**

#### 385 **Experimental Procedure & Apparatus**

386 The MEG data were recorded using a MEGIN Triux system housed in a magnetically shielded room (MSR;  
387 Vacuumschmelze GmbH & co., Hanau, Germany). Neuromagnetic signals were acquired from 204 orthog-  
388 onal planar gradiometers and 102 magnetometers at 102 sensor positions. Horizontal and vertical EOG,  
389 the cardiac ECG signals, stimulus markers as well as luminance changes recorded by a photodiode (see  
390 below) were acquired together with the neuromagnetic signal. The data were lowpass filtered online at 330  
391 Hz and sampled at 1000 Hz. Structural magnetic resonance images (MRIs), for later co-registration with  
392 the MEG data, were acquired using a 3 Tesla Siemens MAGNETOM Prisma whole-body scanner (Siemens  
393 AG, Muenchen, Germany), TE = 2 ms, and TR = 2 s). For two subjects, the T1-weighted images obtained  
394 in previous experiments, using a 3 Tesla Philips Achieva Scanner (Philips North America Corporation, An-  
395 dover, USA), were used (scanned at the former Birmingham University Imaging Centre). Participants were  
396 invited to two separate sessions during which the MEG data and the anatomical images were acquired, re-  
397 spectively. Whenever possible, the MEG recording preceded the MRI scan; otherwise, the MEG session  
398 was scheduled at least 48 hours after the MRI session to avoid any residual magnetisation from the MRI  
399 system. Volunteers were requested to remove all metal items (e.g. jewellery) before entering the MSR. To  
400 enable later co-registration between MRI and MEG data, four to five head-position-indicator (HPI) coils  
401 were attached to the participants' foreheads. Along with the position of the coils, three fiducial landmarks

402 (nasion, left and right tragus) and over 200 head-shape samples were digitized using a Polhemus Fastrak  
403 (Polhemus, Colchester, USA). Following the preparations, the participants were seated in upright position  
404 under the dewar, with orientation set to 60°. The MEG experiment consisted of fifteen blocks lasting 4 min  
405 30 s each. Participants were offered breaks every ~20 min but remained seated. At the beginning of each of  
406 these recording blocks, subjects were instructed to sit with the top and backside of their head touching the  
407 sensor helmet. The positions of the HPI coils relative to the sensors was gathered at the beginning of each  
408 recording block, but not continuously. The MEG experiment lasted ~75 min in total.

#### 409 **Rapid photic stimulation**

410 Stimuli were presented using a Propixx lite projector (VPixx Technologies Inc, Saint-Bruno, QC Canada)  
411 which allows refresh rates of up to 1440 Hz. To achieve this high-frequency mode, the projector separates the  
412 screen (initial resolution: 1920 × 1080 pixels) into quadrants and treats them as separate frames, resulting in  
413 a display resolution of 960 × 540 pixels. The RGB colour codes for each quadrant, viz. red, green and blue,  
414 are converted to a greyscale, separately for each frame and colour, and presented consecutively within one  
415 refresh interval. The resulting twelve frames that are presented at a refresh rate of 120 Hz, i.e. 12 × 120 Hz =  
416 1440 Hz. This approach allows to drive the luminance of each pixel with high temporal precision, allowing  
417 for smooth sinusoidal modulations, reducing unwanted harmonics (see Figure 10C,D). In this study, we  
418 applied rapid rhythmic stimulation at frequencies ranging from 52 to 90 Hz in 2 Hz increments.

#### 419 **Experimental Paradigm**

420 Stimuli were created in MATLAB 2017a (The MathWorks, Inc. Natick, MA, USA) and presented using the  
421 Psychophysics Toolbox Version 3 (Brainard, 1997).

422 *Conditions* The experiment consisted of two conditions that will be referred to as the *flicker* and the  
423 *flicker&gratings* condition, respectively. Each trial began with a one-second interval, in which a central  
424 white fixation cross was presented on a dark grey background. In the *flicker* trials, a circular patch of size  
425 6.47° was presented for 2 s. Its luminance was modulated sinusoidally at frequencies between 52 and 90  
426 Hz (Figure 10A). Frequencies were randomised and balanced across trials. The patch was centred on the  
427 fixation cross, such that it was presented both foveally and parafoveally (Van Pelt & Fries, 2013, and see  
428 *Task & Time Course*). To minimise the visibility of the flicker, the mean luminance of the patch was matched

429 to the background (33% luminance, RGB [84 84 84]). Each trial ended with a two-second interval in which  
430 only the fixation cross was presented.

431 In the *flicker&gratings* condition, the baseline interval was followed by a 2 s presentation of a moving  
432 grating stimulus that has been shown to reliably elicit gamma oscillations in the visual cortex (e.g. Hoogen-  
433 boom et al., 2006, 2010; Muthukumaraswamy & Singh, 2013; Tan et al., 2016). The stimulus was the same  
434 size as the patch ( $6.47^\circ$ ) and had a spatial frequency of 2.93 cycles/ $^\circ$  (see Figure 10B). The rings contracted  
435 towards the centre of the screen with a velocity of 1.06  $^\circ$ /s, i.e. 2.05 cycles/s. In the subsequent 2 s in-  
436 terval, the stimulus was flickered at the respective frequencies, followed by another 2 s interval in which  
437 the concentric moving circles remained on screen without photic stimulation. Note that the modulation of  
438 the luminance can only be applied to non-black tones and therefore only the grey rings of the grating were  
439 flickered. To keep the overall brightness of the stimulation similar between conditions, the luminance of the  
440 circular patch in the *flicker* condition ranged from 0 to 66% (of maximum luminance), while the brightness  
441 of the gratings in the *flicker&gratings* ranged from 33 and 99%. The flicker was applied to a small circular  
442 patch in the lower right corner of the screen, to acquire the stimulation signal with a photodiode.

443 *Task & Time Course* Participants were kept vigilant by performing a simple visual detection task that  
444 required them to respond to a  $45^\circ$  rotation of the fixation cross at the centre of the screen, which occurred  
445 once every minute (e.g. Zaehle et al., 2010). Data including the target and/or the responses were discarded  
446 and not considered in the analysis. The rotation took place after a trial in the majority, i.e. 60%, of the  
447 cases. The remaining 40% of rotations took place at any point during a trial. The experiment was divided  
448 into 15 blocks of 4.5 min, resulting in a recording time of 75 min in total. Within one block, each of the  
449 twenty stimulation frequencies were applied in both conditions, in randomised order. Thus, every block  
450 consisted of 40 frequency  $\times$  2 condition combinations, resulting in a total of 15 repetitions of each of these  
451 combinations (i.e. 15 trials per flicker frequency for each of the two conditions). To minimise the amount of  
452 trials rejected by eye-blink artefacts, 3 s breaks, indicated by a motivating catchphrase or happy face on the  
453 screen, were incorporated every five trials, i.e. every 25 - 35 seconds. Participants were instructed to utilise  
454 these breaks to rest their eyes.

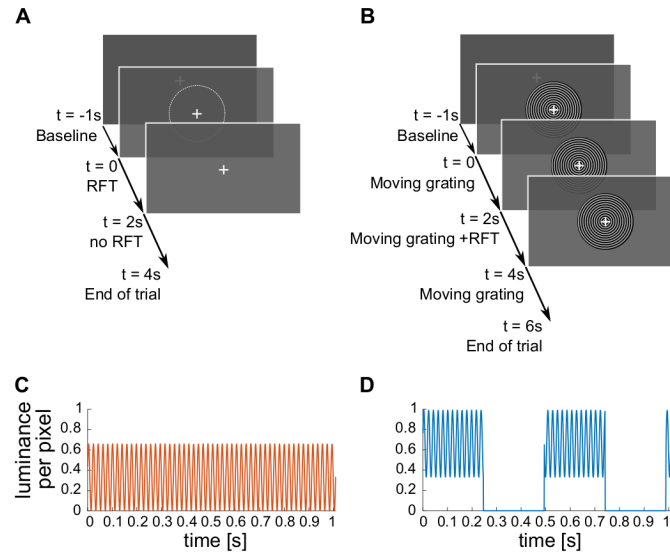

Figure 10: The experimental paradigm. **A** Trials in the *flicker* condition. A 1 s baseline interval with a central fixation cross was followed by a 2 s interval of the rapid flicker applied to circular patch of size  $6.47^\circ$ . The average luminance in the flickering patch was equal to the surrounding grey colour, making the flickering patch almost unperceivable. The trials ended with 2 s of the fixation cross only. **B** The trials in the *flicker&gratings* condition. The 1 s baseline interval was followed by 2 s of grating stimuli presented centrally on the screen, contracting inwards. Subsequently, the flicker was imposed onto the stimuli for 2 s. The trial ended with a 2 s presentation of the moving gratings without photic stimulation. **C** Sinusoidal luminance change in one pixel induced by the photic drive at 52 Hz in the *flicker* condition. **D** Luminance change in one pixel as a result of the flicker and the gratings moving concentrically with a velocity of 2.05 cycles/s. To maintain a similar mean luminance between conditions, photic modulation of the invisible patch in **A** ranged from 0 to 66% (mean RGB [84 84 84]), while the light grey rings of the grating, that is 50% of the stimulus' surface, were flickered between 33 and 99% (mean RGB [168 168 168] per ring).

#### 455 **Participants**

456 This project was reviewed and approved by the local Ethics Committee at University of Birmingham, UK.

457 Thirty-one students of the University of Birmingham participated in the experiment. One experimental

458 session was terminated prematurely due to the participant not being cooperative, resulting in a sample of  
459 thirty participants (15 female), aged  $25.7 \pm 3.4$  years. This sample size was decided upon based on a  
460 conceptually similar study investigating entrainment of neuronal alpha oscillations by Notbohm et al. (2016).  
461 All volunteers declared not to have had a history of neuropsychiatric or psychological disorder, reported to  
462 be medication-free and had normal or corrected-to-normal vision. For safety reasons, participants with metal  
463 items inside their bodies were excluded at the selection state. Prior to taking part in the study, participants  
464 gave informed consent, in accordance with the declaration of Helsinki, to both the MEG recording and the  
465 MRI scan and were explicitly apprised of their right to abort the experiment at any point. The reimbursement  
466 amounted to £15 per hour. To allow analysis of flicker responses at frequencies with a sufficient distance to  
467 the individual gamma frequency (IGF; see ) of the participant, i.e.  $\pm 6$  Hz, 8 participants were excluded due  
468 to their IGF being below 58 Hz. Thus, the data of 22 participants were included in the following analyses  
469 (11 female; mean age 25.7 years).

## 470 **Data Analysis**

471 Analysis was performed in MATLAB 2017a and 2019b (The MathWorks, Inc. Natick, MA, USA) using  
472 the fieldtrip toolbox (Oostenveld et al., 2011).

## 473 **Sensor Analysis**

474 At the sensor level, the analysis was confined to the planar gradiometer signals, as these provided the best  
475 signal-to-noise ratio.

476 *MEG preprocessing* Trials containing the target or button presses were excluded. The data were read into  
477 MATLAB as 5 s and 7 s trials for the *flicker* and *flicker&gratings* conditions, respectively. Artefactual  
478 sensors were identified visually during and after the recordings for each participant, and interpolated with  
479 the data of their neighbouring sensors (0 to 2 sensors per participant). The individual trials were linearly  
480 detrended. Trials containing head movements and/or multiple eye blinks were discarded using a semi-  
481 automatic approach. An ICA approach ('runica' implemented in FieldTrip) was used to project out cardiac  
482 signals, eye blinks and eye movement. The sensor positions relative to the HPI coils were loaded in from  
483 the data files and averaged for each subject.

484 *Time-Frequency Representation of Power* Time-Frequency Representations (TFRs) of power were calcu-  
485 lated using a sliding time-window approach ( $\Delta T = 0.5$  s; 0.05 s steps). A Hanning taper (0.5 s) was applied  
486 prior to the Fourier-transform. This approach induced spectral smoothing of  $\pm 3$  Hz. Relative power change  
487 in response to the stimulation, i.e. the moving grating and/or the photic drive, was calculated as:

$$P_{\text{normalized}} = \frac{P_{\text{stim}}}{P_{\text{base}}} - 1 \quad (1)$$

488 with  $P_{\text{stim}}$  being the power during stimulation and  $P_{\text{base}}$  being the power in the baseline interval. The  
489 baseline interval was 0.75 - 0.25 s prior to the onset of the flicker (*flicker* condition) or the moving grating  
490 stimulus (*flicker&gratings* condition).

491 *Individual Gamma Frequency* The frequency band of the oscillatory activity elicited in response to the  
492 moving grating stimulus was identified individually per participant. TFRs of power were calculated for the  
493 baseline interval and presentation of the moving grating in the *flicker&gratings* condition and averaged over  
494 trials. The results were averaged over the 0.25 - 1.75 s interval, and the frequency bin with the maximum  
495 relative power was considered the Individual Gamma Frequency (IGF). In the case of two maxima, the  
496 average of the respective two frequencies was treated as the IGF. For each participant, the 4 to 6 gradiometers  
497 with the strongest gamma response to the moving gratings were selected as the Sensors-of-Interest (SOI).

498 *Phase-Locking* The average phase-synchrony between the photodiode (recording the visual flicker) and  
499 the neuromagnetic signal at the SOI was quantified by the Phase-Locking Value (PLV) (Lachaux et al.,  
500 1999; Bastos & Schoffelen, 2016) calculated using the 0.5 s sliding window multiplied with a Hanning  
501 taper of equal length. The phases of both signals were calculated from Fourier transformations, applied to  
502 the tapered segments. The PLV was computed separately for each *frequency*  $\times$  *condition*:

$$PLV = \frac{1}{n} \left| \sum_{n=1}^N \exp(j\theta(t, n)) \right| \quad (2)$$

503 where  $\theta(t, n) = \phi_m(t, n) - \phi_p(t, n)$  is the phase difference between the MEG (m) and the photodiode (p)  
504 signal at time bin  $t$  in trial  $n$  (see Lachaux et al., 1999, p.195 and Figure 4 and 8).

505 *Phase difference as a measure of entrainment* Additionally, we investigated changes in phase difference  
506 between the photodiode and neuromagnetic signal over time for flicker frequencies of  $IGF \pm 6$  Hz, to identify  
507 intervals of strong synchrony, so-called *phase plateaus*. MEG and photodiode signals ( $\Delta T = 3$  cycles =  
508  $3/f_{flicker}$ s) were convolved with a complex Hanning taper using the sliding time window approach. Phase  
509 angles were derived from the Fourier transformed time series, unwrapped and subtracted to estimate the  
510 phase difference over time for each trial. Plateaus were defined as a constant phase angle (maximum average  
511 gradient 0.01 rad/ms) over the duration of one cycle of the stimulation frequency:

$$\frac{\sum_{i=1}^{\Delta T} |\nabla \theta_i|}{n} \leq 0.01 \text{rad/ms} \quad (3)$$

512 with  $\nabla \theta_i$  being the gradient, i.e. slope, of the phase angle between MEG and photodiode signal at a  
513 given sample  $i$  and  $n$  being the length of the cycle in ms, rounded up to the next integer, e.g. 17 ms for a  
514 flicker frequency of 60 Hz. While the PLV quantifies the average phase-similarity of the two signals over  
515 trials, this approach allows to investigate to what extent the stimulation and the MEG signal align in terms  
516 of phase-difference in a given time interval.

517 *Statistical Analysis* Statistical Analysis was performed in RStudio Version 1.2.1355 (RStudio Inc., North-  
518 ern Ave, Boston, MA; R version 3.6.1., The R Foundation for Statistical Computing).

## 519 **Source Analysis**

520 *MRI preprocessing* The raw T1 weighted images were converted from DICOM to NIFTI. The coordinate  
521 system of the participants' individual MRI was aligned to the anatomical landmarks using the head-surface  
522 obtained from the MRI and the scalp shapes digitized prior to the recordings. Realignment was done au-  
523 tomatically using the Iterative Closest Point (ICP) algorithm (Besl & McKay, 1992) implemented in the  
524 FieldTrip toolbox and corrected manually as necessary. The digitised headshape of one participant, for  
525 whom there was no anatomical image available, was aligned to a standardised template brain.

526 *Linearly Constrained Minimum Variance Beamforming* The neuroanatomical origins of the visually in-  
527 duced gamma oscillations in the *flicker&gratings* condition and the response induced by the photic drive in



528 the *flicker* condition were estimated using Linearly Constrained Minimum Variance spatial filters (LCMV;  
529 Veen et al., 1992), implemented in the Fieldtrip Toolbox (Oostenveld et al., 2011). The MEG forward model  
530 was calculated using single-shell head-models, estimated based on the aligned anatomical images, and an  
531 equally spaced 4-mm grid, warped into MNI (Montreal Neurologic Institute) space (Nolte 2003, also see  
532 Oostenveld et al., 2011; Stenroos et al., 2012); yielding 37,163 dipoles inside the brain. The pre-processed  
533 data, epoched in 7 and 5-second trials for the respective conditions, were band-pass filtered at 50 to 92 Hz,  
534 by applying second order Butterworth two-pass high- and low-pass filters. Segments of 0.5 s of the base-  
535 line interval (0.75 - 0.25 s prior to stimulation) and stimulation interval (0.75 - 1.25 s after flicker/grating  
536 onset) were derived from the filtered data. For each participant, a common covariance matrix for the 204  
537 planar gradiometers was computed based on the extracted time series and used to estimate the spatial filter  
538 coefficients for each dipole location, whereby only the direction with the highest dipole moment was con-  
539 sidered. Data in the baseline and stimulation intervals were projected to source space by multiplying each  
540 filter coefficient with the sensor time series. Fast Fourier Transforms of the resulting time series, multiplied  
541 with a Hanning taper, were computed for each of the 37,163 virtual channels, separately for the baseline  
542 and stimulation intervals, and averaged over trials. Relative power change at the IGF and flicker frequencies  
543 was computed by applying equation (1) to the Fourier-transformed baseline and stimulation intervals. The  
544 source-localised power change values at flicker frequencies up to 78 Hz were averaged to identify a common  
545 source for the oscillatory response to the photic drive.

## 546 **Acknowledgements**

547 This study was funded by a James S. McDonnell Foundation Understanding Human Cognition Collabora-  
548 tive Award (grant number 220020448), the Wellcome Trust Investigator Award in Science (grant number  
549 207550), a BBSRC grant (BB/R018723/1), as well as the Royal Society Wolfson Research Merit Award  
550 (awarded to O.J.). The authors are grateful to Prof Veikko Jousmaki for providing the light-to-voltage con-  
551 verter and to Jonathan L. Winter, Nina Salman, Ludwig Barbaro, and Roya Jalali for help with the MEG  
552 recordings and MRI scans. The authors further thank Dr Simon Hanslmayr, Dr Geoffrey Brookshire and Dr  
553 Florian Kasten for feedback on the project and manuscript.

554 **Conflict of interest statement:** The authors declare no competing financial or non-financial interest.



555 **Contributions:** K.D., C.S.H. and O.J. conceptualised the study; K.D., T.P.G. and O.J. programmed the  
556 experiment; K.D. recorded the data; all authors analysed the data and wrote the manuscript.

## 557 **References**

- 558 Adaikkan, C., Middleton, S. J., Marco, A., Pao, P. C., Mathys, H., Kim, D. N. W., . . . Tsai, L. H. (2019).  
559 Gamma Entrainment Binds Higher-Order Brain Regions and Offers Neuroprotection. *Neuron*, *102*, 929–  
560 943.e8. doi: 10.1016/j.neuron.2019.04.011
- 561 Adaikkan, C., & Tsai, L. H. (2020). Gamma Entrainment: Impact on Neurocircuits, Glia, and Therapeutic  
562 Opportunities. *Trends in Neurosciences*, *43*, 24–41. doi: 10.1016/j.tins.2019.11.001
- 563 Baillet, S. (2013). Forward and Inverse Problems of MEG/EEG. In *Encyclopedia of Computational Neuro-*  
564 *science* (pp. 1–8). New York, NY: Springer New York. doi: 10.1007/978-1-4614-7320-6\_529-1
- 565 Bastos, A. M., & Schoffelen, J. M. (2016). A tutorial review of functional connectivity analysis methods and  
566 their interpretational pitfalls. *Frontiers in Systems Neuroscience*, *9*, 175. doi: 10.3389/fnsys.2015.00175
- 567 Bauer, F., Cheadle, S. W., Parton, A., Müller, H. J., & Usher, M. (2009). Gamma flicker triggers attentional  
568 selection without awareness. *Proceedings of the National Academy of Sciences of the United States of*  
569 *America*, *106*, 1666–1671. doi: 10.1073/pnas.0810496106
- 570 Bauer, M., Akam, T., Joseph, S., Freeman, E., & Driver, J. (2012). Does visual flicker phase at gamma  
571 frequency modulate neural signal propagation and stimulus selection? *Journal of Vision*, *12*, 1–10. doi:  
572 10.1167/12.4.5
- 573 Başar-Eroglu, C., Strüber, D., Schürmann, M., Stadler, M., & Başar, E. (1996). Gamma-band responses  
574 in the brain: A short review of psychophysiological correlates and functional significance. *International*  
575 *Journal of Psychophysiology*, *24*, 101–112. doi: 10.1016/S0167-8760(96)00051-7
- 576 Besl, P. J., & McKay, N. D. (1992). A Method for Registration of 3-D Shapes. In *Ieee transactions on*  
577 *pattern analysis and machine intelligence* (Vol. 14, pp. 239–256). doi: 10.1109/34.121791
- 578 Brainard, D. H. (1997). The Psychophysics Toolbox. *Spatial Vision*, *10*, 433–436. doi: 10.1163/  
579 156856897X00357

- 580 Bressler, S. L. (1990). The gamma wave: a cortical information carrier? *Trends in Neurosciences*, *13*,  
581 161–162. doi: 10.1016/0166-2236(90)90039-D
- 582 Brosch, M., Budinger, E., & Scheich, H. (2002). Stimulus-related gamma oscillations in primate auditory  
583 cortex. *Journal of Neurophysiology*, *87*, 2715–2725. doi: 10.1152/jn.2002.87.6.2715
- 584 Buffalo, E. A., Fries, P., Landman, R., Buschman, T. J., & Desimone, R. (2011). Laminar differences in  
585 gamma and alpha coherence in the ventral stream. *Proceedings of the National Academy of Sciences of*  
586 *the United States of America*, *108*, 11262–11267. doi: 10.1073/pnas.1011284108
- 587 Buzsáki, G., Horváth, Z., Urioste, R., Hetke, J., & Wise, K. (1992). High-frequency network oscillation in  
588 the hippocampus. *Science*, *256*, 1025–1027. doi: 10.1126/science.1589772
- 589 Buzsáki, G., & Wang, X. J. (2012). Mechanisms of gamma oscillations. *Annual Review of Neuroscience*,  
590 *35*, 203–225. doi: 10.1146/annurev-neuro-062111-150444
- 591 Carandini, M., Heeger, D. J., & Movshon, J. A. (1997). Linearity and normalization in simple cells of the  
592 macaque primary visual cortex. *Journal of Neuroscience*, *17*, 8621–8644. doi: 10.1523/jneurosci.17-21  
593 -08621.1997
- 594 Colgin, L. L., Denninger, T., Fyhn, M., Hafting, T., Bonnevie, T., Jensen, O., ... Moser, E. I. (2009).  
595 Frequency of gamma oscillations routes flow of information in the hippocampus. *Nature*, *462*, 353–357.  
596 doi: 10.1038/nature08573
- 597 Connelly, W. M., Laing, M., Errington, A. C., & Crunelli, V. (2015). The thalamus as a low pass filter:  
598 Filtering at the cellular level does not equate with filtering at the network level. *Frontiers in Neural*  
599 *Circuits*, *9*, 89. doi: 10.3389/fncir.2015.00089
- 600 Cormack, L. K. (2005). Computational Models of Early Human Vision. In *Handbook of image and video*  
601 *processing* (pp. 325–345). Elsevier. doi: 10.1016/B978-012119792-6/50083-8
- 602 Dougherty, K., Cox, M. A., Ninomiya, T., Leopold, D. A., & Maier, A. (2017). Ongoing alpha activity in  
603 V1 regulates visually driven spiking responses. *Cerebral Cortex*, *27*, 1113–1124. doi: 10.1093/cercor/  
604 bhv304

- 605 Douglas, R. J., & Martin, K. A. (2004). Neuronal circuits of the neocortex. *Annual Review of Neuroscience*,  
606 27, 419–451. doi: 10.1146/annurev.neuro.27.070203.144152
- 607 Drijvers, L., Spaak, E., & Jensen, O. (2020). Rapid invisible frequency tagging reveals nonlinear integration  
608 of auditory and visual semantic information. *bioRxiv*. doi: 10.1101/2020.04.29.067454
- 609 Eckhorn, R., Bauer, R., Jordan, W., Brosch, M., Kruse, W., Munk, M., & Reitboeck, H. J. (1988). Coherent  
610 oscillations: A mechanism of feature linking in the visual cortex? - Multiple electrode and correlation  
611 analyses in the cat. *Biological Cybernetics*, 60, 121–130. doi: 10.1007/BF00202899
- 612 Engel, A. K., Fries, P., & Singer, W. (2001). Dynamic predictions: Oscillations and synchrony in top-down  
613 processing. *Nature Reviews Neuroscience*, 2, 704–716. doi: 10.1038/35094565
- 614 Engel, A. K., Konig, P., & Singer, W. (1992). Synchronization of oscillatory neuronal responses in cat striate  
615 cortex: Temporal properties. *Visual Neuroscience*, 8, 337–347. doi: 10.1017/S0952523800005071
- 616 Fiene, M., Schwab, B. C., Misselhorn, J., Herrmann, C. S., Schneider, T. R., & Engel, A. K. (2020). Phase-  
617 specific manipulation of rhythmic brain activity by transcranial alternating current stimulation. *Brain*  
618 *Stimulation*, 13, 1254–1262. doi: 10.1016/j.brs.2020.06.008
- 619 Fries, P., Nikolić, D., & Singer, W. (2007). The gamma cycle. *Trends in Neurosciences*, 30, 309–316. doi:  
620 10.1016/j.tins.2007.05.005
- 621 Fröhlich, F. (2016). *Network Neuroscience*. Academic Press. doi: 10.1515/9781400851935-012
- 622 Gray, C. M., & Singer, W. (1989). Stimulus-specific neuronal oscillations in orientation columns of cat  
623 visual cortex. *Proceedings of the National Academy of Sciences of the United States of America*, 86,  
624 1698–1702. doi: 10.1073/pnas.86.5.1698
- 625 Grützner, C., Wibral, M., Sun, L., Rivolta, D., Singer, W., Maurer, K., & Uhlhaas, P. (2013). Deficits in  
626 high-( $> 60$  Hz) gamma-band oscillations during visual processing in schizophrenia. *Frontiers in Human*  
627 *Neuroscience*, 7, 88. doi: 10.3389/fnhum.2013.00088
- 628 Gulbinaite, R., Roozendaal, D. H., & VanRullen, R. (2019). Attention differentially modulates the amplitude  
629 of resonance frequencies in the visual cortex. *NeuroImage*, 203, 116–146. doi: 10.1016/j.neuroimage

630 .2019.116146

631 Haegens, S., Barczak, A., Musacchia, G., Lipton, M. L., Mehta, A. D., Lakatos, P., & Schroeder, C. E.  
632 (2015). Laminar profile and physiology of the  $\alpha$  rhythm in primary visual, auditory, and somatosensory  
633 regions of neocortex. *Journal of Neuroscience*, *35*, 14341–14352. doi: 10.1523/JNEUROSCI.0600-15  
634 .2015

635 Hanslmayr, S., Matuschek, J., & Fellner, M. C. (2014). Entrainment of prefrontal beta oscillations induces  
636 an endogenous echo and impairs memory formation. *Current Biology*, *24*, 904–909. doi: 10.1016/  
637 j.cub.2014.03.007

638 Hawken, M. J., Shapley, R. M., & Grosz, D. H. (1996). Temporal-frequency selectivity in monkey visual  
639 cortex. *Journal of Neuroscience*, *13*, 477–492. doi: 10.1017/s0952523800008154

640 Helfrich, R. F., Breska, A., & Knight, R. T. (2019). Neural entrainment and network resonance in support  
641 of top-down guided attention. *Current Opinion in Psychology*, *29*, 82–89. doi: 10.1016/j.copsyc.2018.12  
642 .016

643 Hermes, D., Miller, K., Wandell, B., & Winawer, J. (2015). Stimulus dependence of gamma oscillations in  
644 human visual cortex. *Cerebral Cortex*, *25*, 2951–2959. doi: 10.1093/cercor/bhu091

645 Herrmann, C. S. (2001). Human EEG responses to 1-100 Hz flicker: Resonance phenomena in visual cortex  
646 and their potential correlation to cognitive phenomena. *Experimental Brain Research*, *137*, 346–353. doi:  
647 10.1007/s002210100682

648 Herrmann, C. S., & Demiralp, T. (2005). Human EEG gamma oscillations in neuropsychiatric disorders.  
649 *Clinical Neurophysiology*, *116*, 2719–2733. doi: 10.1016/j.clinph.2005.07.007

650 Herrmann, C. S., & Mecklinger, A. (2001). Gamma activity in human EEG is related to highspeed  
651 memory comparisons during object selective attention. *Visual Cognition*, *8*, 593–608. doi: 10.1080/  
652 13506280143000142

653 Hodge, R. D., Bakken, T. E., Miller, J. A., Smith, K. A., Barkan, E. R., Graybuck, L. T., ... Others (2019).  
654 Conserved cell types with divergent features in human versus mouse cortex. *Nature*, *573*, 61–68. doi:

655 10.1038/s41586-019-1506-7

656 Hoogenboom, N., Schoffelen, J. M., Oostenveld, R., & Fries, P. (2010). Visually induced gamma-band  
657 activity predicts speed of change detection in humans. *NeuroImage*, *51*, 1162–1167. doi: 10.1016/  
658 j.neuroimage.2010.03.041

659 Hoogenboom, N., Schoffelen, J. M., Oostenveld, R., Parkes, L. M., & Fries, P. (2006). Localizing human  
660 visual gamma-band activity in frequency, time and space. *NeuroImage*, *29*, 764–773. doi: 10.1016/  
661 j.neuroimage.2005.08.043

662 Hutcheon, B., & Yarom, Y. (2000). Resonance, oscillation and the intrinsic frequency preferences of  
663 neurons. *Trends in Neurosciences*, *23*, 216–222. doi: 10.1016/S0166-2236(00)01547-2

664 Hutt, A., Griffiths, J. D., Herrmann, C. S., & Lefebvre, J. (2018). Effect of stimulation waveform on the  
665 non-linear entrainment of cortical alpha oscillations. *Frontiers in Neuroscience*, *12*, 376. doi: 10.3389/  
666 fnins.2018.00376

667 Iaccarino, H. F., Singer, A. C., Martorell, A. J., Rudenko, A., Gao, F., Gillingham, T. Z., . . . Tsai, L. H.  
668 (2016). Gamma frequency entrainment attenuates amyloid load and modifies microglia. *Nature*, *540*,  
669 230–235. doi: 10.1038/nature20587

670 Jensen, O., Kaiser, J., & Lachaux, J. P. (2007). Human gamma-frequency oscillations associated with  
671 attention and memory. *Trends in Neurosciences*, *30*, 317–324. doi: 10.1016/j.tins.2007.05.001

672 Johns, P. (2014). *Clinical Neuroscience*. Elsevier Health Sciences. doi: 10.1016/c2009-0-35511-7

673 Kuffler, S. W. (1953). Discharge patterns and functional organization of mammalian retina. *Journal of*  
674 *neurophysiology*, *16*, 37–68. doi: 10.1152/jn.1953.16.1.37

675 Kumpulainen, P. (n.d.). Pekka Kumpulainen (2020). `tight_subplot(Nh, Nw, gap, marg_-`  
676 `h, marg_w)` ([https://www.mathworks.com/matlabcentral/fileexchange/27991-tight\\_subplot-nh-nw-gap-](https://www.mathworks.com/matlabcentral/fileexchange/27991-tight_subplot-nh-nw-gap-marg_h-marg_w)  
677 `marg_h-marg_w`), *MATLAB Central File Exchange*.

678 Lacadie, C. M., Fulbright, R. K., Arora, J., Constable, R. T., & Papademetris, X. (2007). Brodmann Areas  
679 defined in MNI space using new Tracing Tool in BioImage Suite. In *Proceedings of the 14th annual*

- 680 *meeting of the organization for human brain mapping* (Vol. 36, p. 6494).
- 681 Lacadie, C. M., Fulbright, R. K., Rajeevan, N., Constable, R. T., & Papademetris, X. (2008). More accurate  
682 Talairach coordinates for neuroimaging using non-linear registration. *NeuroImage*, *42*, 717–725. doi:  
683 10.1016/j.neuroimage.2008.04.240
- 684 Lachaux, J. P., Rodriguez, E., Martinerie, J., & Varela, F. J. (1999). Measuring phase synchrony in  
685 brain signals. *Human Brain Mapping*, *8*, 194–208. doi: 10.1002/(SICI)1097-0193(1999)8:4<194::  
686 AID-HBM4>3.0.CO;2-C
- 687 Lee, S., & Jones, S. R. (2013). Distinguishing mechanisms of gamma frequency oscillations in human  
688 current source signals using a computational model of a laminar neocortical network. *Frontiers in Human*  
689 *Neuroscience*, *7*, 869. doi: 10.3389/fnhum.2013.00869
- 690 Müller, M. M., Junghöfer, M., Elbert, T., & Rochstroh, B. (1997). Visually induced gamma-band responses  
691 to coherent and incoherent motion: A replication study. *NeuroReport*, *8*, 2575–2579. doi: 10.1097/  
692 00001756-199707280-00031
- 693 Muthukumaraswamy, S. D., & Singh, K. D. (2013). Visual gamma oscillations: The effects of stimulus  
694 type, visual field coverage and stimulus motion on MEG and EEG recordings. *NeuroImage*, *69*, 223–230.  
695 doi: 10.1016/j.neuroimage.2012.12.038
- 696 Muthukumaraswamy, S. D., Singh, K. D., Swettenham, J. B., & Jones, D. K. (2010). Visual gamma  
697 oscillations and evoked responses: Variability, repeatability and structural MRI correlates. *NeuroImage*,  
698 *49*, 3349–3357. doi: 10.1016/j.neuroimage.2009.11.045
- 699 Nikolić, D., Fries, P., & Singer, W. (2013). Gamma oscillations: Precise temporal coordination without a  
700 metronome. *Trends in Cognitive Sciences*, *17*, 54–55. doi: 10.1016/j.tics.2012.12.003
- 701 Nolte, G. (2003). The magnetic lead field theorem in the quasi-static approximation and its use for magne-  
702 toencephalography forward calculation in realistic volume conductors. *Physics in Medicine and Biology*,  
703 *48*, 3637–3652. doi: 10.1088/0031-9155/48/22/002

- 704 Notbohm, A., Kurths, J., & Herrmann, C. S. (2016). Modification of brain oscillations via rhythmic light  
705 stimulation provides evidence for entrainment but not for superposition of event-related responses. *Frontiers in Human Neuroscience*, *10*, 10. doi: 10.3389/fnhum.2016.00010  
706
- 707 Oostenveld, R., Fries, P., Maris, E., & Schoffelen, J. M. (2011). FieldTrip: Open source software for  
708 advanced analysis of MEG, EEG, and invasive electrophysiological data. *Computational Intelligence and  
709 Neuroscience*, *2011*, 115678–156869. doi: 10.1155/2011/156869
- 710 Orekhova, E. V., Butorina, A. V., Sysoeva, O. V., Prokofyev, A. O., Nikolaeva, A. Y., & Stroganova, T. A.  
711 (2015). Frequency of gamma oscillations in humans is modulated by velocity of visual motion. *Journal  
712 of Neurophysiology*, *114*, 244–255. doi: 10.1152/jn.00232.2015
- 713 Perry, G., Hamandi, K., Brindley, L. M., Muthukumaraswamy, S. D., & Singh, K. D. (2013). The properties  
714 of induced gamma oscillations in human visual cortex show individual variability in their dependence on  
715 stimulus size. *NeuroImage*, *68*, 83–92. doi: 10.1016/j.neuroimage.2012.11.043
- 716 Pikovsky, A., Kurths, J., Rosenblum, M., & Kurths, J. (2003). *Synchronization: a universal concept in  
717 nonlinear sciences* (Vol. 12). USA: Cambridge University Press.
- 718 Ray, S., & Maunsell, J. H. (2011). Different origins of gamma rhythm and high-gamma activity in macaque  
719 visual cortex. *PLoS Biology*, *9*. doi: 10.1371/journal.pbio.1000610
- 720 Ringach, D. L. (2004). Mapping receptive fields in primary visual cortex. *Journal of Physiology*, *558*,  
721 717–728. doi: 10.1113/jphysiol.2004.065771
- 722 Roberts, M. J., Lowet, E., Brunet, N. M., TerWal, M., Tiesinga, P., Fries, P., & DeWeerd, P. (2013). Robust  
723 gamma coherence between macaque V1 and V2 by dynamic frequency matching. *Neuron*, *78*, 523–536.  
724 doi: 10.1016/j.neuron.2013.03.003
- 725 Rodriguez, E., George, N., Lachaux, J. P., Martinerie, J., Renault, B., & Varela, F. J. (1999). Perception's  
726 shadow: Long-distance synchronization of human brain activity. *Nature*, *397*, 430–433. doi: 10.1038/  
727 17120



- 728 Rolls, E. T., Huang, C. C., Lin, C. P., Feng, J., & Joliot, M. (2020). Automated anatomical labelling atlas 3.  
729 *NeuroImage*, 206, 116189. doi: 10.1016/j.neuroimage.2019.116189
- 730 Schadow, J., Lenz, D., Thaerig, S., Busch, N. A., Fründ, I., Rieger, J. W., & Herrmann, C. S. (2007). Stim-  
731 ulus intensity affects early sensory processing: Visual contrast modulates evoked gamma-band activity  
732 in human EEG. *International Journal of Psychophysiology*, 66, 28–36. doi: 10.1016/j.ijpsycho.2007.05  
733 .010
- 734 Schwab, K., Ligges, C., Jungmann, T., Hilgenfeld, B., Haueisen, J., & Witte, H. (2006). Alpha entrainment  
735 in human electroencephalogram and magnetoencephalogram recordings. *NeuroReport*, 17, 1829–1833.  
736 doi: 10.1097/01.wnr.0000246326.89308.ec
- 737 Sharpee, T. O., Sugihara, H., Kurgansky, A. V., Rebrik, S. P., Stryker, M. P., & Miller, K. D. (2006).  
738 Adaptive filtering enhances information transmission in visual cortex. *Nature*, 439, 936–942. doi: 10  
739 .1038/nature04519
- 740 Singer, W. (1999). Neuronal synchrony: A versatile code for the definition of relations? *Neuron*, 24, 49–65.  
741 doi: 10.1016/S0896-6273(00)80821-1
- 742 Singer, W. (2009). Distributed processing and temporal codes in neuronal networks. *Cognitive Neurody-*  
743 *namics*, 3, 189–196. doi: 10.1007/s11571-009-9087-z
- 744 Singer, W., & Gray, C. M. (1995). Visual feature integration and the temporal correlation hypothesis. *Annual*  
745 *Review of Neuroscience*, 18, 555–586. doi: 10.1146/annurev.ne.18.030195.003011
- 746 Spaak, E., Bonnefond, M., Maier, A., Leopold, D. A., & Jensen, O. (2012). Layer-specific entrainment of  
747 gamma-band neural activity by the alpha rhythm in monkey visual cortex. *Current Biology*, 22, 2313–  
748 2318. doi: 10.1016/j.cub.2012.10.020
- 749 Spaak, E., de Lange, F. P., & Jensen, O. (2014). Local entrainment of alpha oscillations by vi-  
750 sual stimuli causes cyclic modulation of perception. *Journal of Neuroscience*, 34, 3536–3544. doi:  
751 10.1523/JNEUROSCI.4385-13.2014



- 752 Stenroos, M., Hunold, A., Eichardt, R., & Hauelsen, J. (2012). Comparison of three- and single-shell  
753 volume conductor models in magnetoencephalography. *Biomedizinische Technik*, *57*, 311. doi: 10.1515/  
754 bmt-2012-4396
- 755 Tallon, C., Bertrand, O., Bouchet, P., & Pernier, J. (1995). Gamma-range Activity Evoked by Coherent  
756 Visual Stimuli in Humans. *European Journal of Neuroscience*, *7*, 1285–1291. doi: 10.1111/j.1460-9568  
757 .1995.tb01118.x
- 758 Tallon-Baudry, C. (2009). The roles of gamma-band oscillatory synchrony in human visual cognition.  
759 *Frontiers in Bioscience*, *14*, 321–332. doi: 10.2741/3246
- 760 Tan, H. R., Gross, J., & Uhlhaas, P. J. (2016). MEG sensor and source measures of visually induced gamma-  
761 band oscillations are highly reliable. *NeuroImage*, *137*, 34–44. doi: 10.1016/j.neuroimage.2016.05.006
- 762 Tass, P., Rosenblum, M. G., Weule, J., Kurths, J., Pikovsky, A., Volkman, J., ... Freund, H. J. (1998).  
763 Detection of n:m phase locking from noisy data: Application to magnetoencephalography. , *81*, 3291–  
764 3294. doi: 10.1103/PhysRevLett.81.3291
- 765 Traub, R. D., & Whittington, M. (2010). *Cortical Oscillations in Health and Disease*. USA: Oxford  
766 University Press. doi: 10.1093/acprof:oso/9780195342796.001.0001
- 767 Traub, R. D., Whittington, M. A., Stanford, I. M., & Jefferys, J. G. (1996). A mechanism for generation of  
768 long-range synchronous fast oscillations in the cortex. *Nature*, *383*, 621–624. doi: 10.1038/383621a0
- 769 Uhlhaas, P. J., Pipa, G., Lima, B., Melloni, L., Neuenschwander, S., Nikolić, D., & Singer, W. (2009).  
770 Neural synchrony in cortical networks: History, concept and current status. *Frontiers in Integrative*  
771 *Neuroscience*, *3*, 17. doi: 10.3389/neuro.07.017.2009
- 772 Uhlhaas, P. J., & Singer, W. (2006). Neural synchrony in brain disorders: relevance for cognitive dysfunc-  
773 tions and pathophysiology. *Neuron*, *52*(1), 155–168.
- 774 Van Pelt, S., & Fries, P. (2013). Visual stimulus eccentricity affects human gamma peak frequency. *Neu-  
775 roImage*, *78*, 439–447. doi: 10.1016/j.neuroimage.2013.04.040

- 776 Varela, F., Lachaux, J. P., Rodriguez, E., & Martinerie, J. (2001). The brainweb: Phase synchronization and  
777 large-scale integration. *Nature Reviews Neuroscience*, 2, 229–239. doi: 10.1038/35067550
- 778 Veen, B., Joseph, J., & Hecox, K. (1992). Localization of intra-cerebral sources of electrical activity  
779 via linearly constrained minimum variance spatial filtering. *1992 IEEE 6th SP Workshop on Statistical*  
780 *Signal and Array Processing, SSAP 1992 - Conference Proceedings*, 44, 526–529. doi: 10.1109/SSAP  
781 .1992.246899
- 782 Von der Malsburg, C. (1999). The what and why of binding: the modeler's perspective. *Neuron*, 24,  
783 95–104.
- 784 Wehr, M., & Laurent, G. (1996). Odour encoding by temporal sequences of firing in oscillating neural  
785 assemblies. *Nature*, 384, 162–166. doi: 10.1038/384162a0
- 786 Williams, P. E., Mechler, F., Gordon, J., Shapley, R., & Hawken, M. J. (2004). Erratum: Entrainment to  
787 video displays in primary visual cortex of macaque and humans. *Journal of Neuroscience*, 24, 8278–  
788 8288.
- 789 Womelsdorf, T., Fries, P., Mitra, P. P., & Desimone, R. (2006). Gamma-band synchronization in visual  
790 cortex predicts speed of change detection. *Nature*, 439, 733–736. doi: 10.1038/nature04258
- 791 Xing, D., Yeh, C. I., Burns, S., & Shapley, R. M. (2012). Laminar analysis of visually evoked activity in the  
792 primary visual cortex. *Proceedings of the National Academy of Sciences of the United States of America*,  
793 109, 13871–13876. doi: 10.1073/pnas.1201478109
- 794 Zaehle, T., Rach, S., & Herrmann, C. S. (2010). Transcranial Alternating Current Stimulation Enhances  
795 Individual Alpha Activity in Human EEG. *PLoS ONE*, 5, e13766. doi: 10.1371/journal.pone.0013766
- 796 Zhigalov, A., Herring, J. D., Herpers, J., Bergmann, T. O., & Jensen, O. (2019). Probing cortical excitability  
797 using rapid frequency tagging. *NeuroImage*, 195, 59–66. doi: 10.1016/j.neuroimage.2019.03.056
